# Supplementary material for: Depression and its determinants among adolescents in Jimma town, Southwest Ethiopia
Source: PLoS One. 2021 May 3;16(5):e0250927. doi: 10.1371/journal.pone.0250927 (PMC8092653; doi:10.1371/journal.pone.0250927)
Supplement: S1 Dataset — (XLS) [file pone.0250927.s001.xls]

## Sheet: 2018 data (1)
IDAUTOMA	AGECHRON	SEXRESPO	GRADELEV	RELIGION	SCHOOLTY	FATHOCUO	MATHOCUO	FATHEDUE	MATHEDUE	RESIDECE	INTEREST	DEPRESSF	SLEEPCON	FATGUEFE	APPETITE	WORTHFEE	CONCENTR	SLOWLYSE	DEATHWIS	DYSTHICF	DIFICULT	SUICMOTH	SUICEVER	CLOSENUM	CONCERNP	HELPPRAT	SMOKEHAV	DRINKTAK	CHATCHEW	OTHERSUB	HEALTHSE	OSL3	BMI	agebin3	grade9	grade10	grade11	grade12	orthodox	muslim	protestant	other	abuse	neglect	oslo3	lowsupp	highsupp	scoredep
1	15	0	1	1	1	4	3	4	3	0	0	0	0	0	0	0	0	0	0	0	1	0	0	2	5	3	0	0	0	0	4	10	20.3125	1	1	0	0	0	1	0	0	0	0	0	2	0	0	0
2	16	1	1	1	1	3	4	5	5	0	0	1	1	0	1	0	0	1	0	0	2	0	1	2	3	4	0	1	0	0	4	9	19.052	1	1	0	0	0	1	0	0	0	0	0	2	0	0	4
3	16	0	1	1	1	3	5	3	4	0	0	0	0	0	0	0	0	0	3	0	2	0	1	1	3	3	0	0	0	0	5	7	19.6094	1	1	0	0	0	1	0	0	0	1	0	1	1	0	3
4	15	1	1	1	0	3	4	4	5	0	1	3	0	3	1	0	0	1	3	1	1	0	0	2	1	1	0	0	0	0	4	4	16.3453	1	1	0	0	0	1	0	0	0	0	0	1	1	0	12
5	15	0	1	2	1	1	1	5	5	0	2	0	0	1	0	1	0	1	0	0	1	0	0	2	4	4	0	0	0	0	4	10	23.9352	1	1	0	0	0	0	1	0	0	1	0	2	0	0	5
6	18	0	2	1	1	5	5	1	1	0	1	1	3	1	3	1	0	2	1	0	2	0	1	2	2	1	0	0	1	0	4	5	15.8203	3	0	1	0	0	1	0	0	0	1	1	1	1	0	13
7	16	0	1	1	1	3	3	3	3	0	0	1	2	0	2	0	3	0	0	0	2	0	0	4	5	2	0	1	0	0	4	11	15.4637	1	1	0	0	0	1	0	0	0	0	1	2	0	0	8
8	16	0	1	1	1	4	4	3	2	0	2	3	1	0	0	0	2	0	0	0	1	0	0	4	4	3	0	0	0	0	3	11	20.6297	1	1	0	0	0	1	0	0	0	0	0	2	0	0	8
9	16	0	1	1	1	3	5	3	3	0	0	0	2	0	0	0	0	3	0	0	1	0	0	4	5	5	0	0	0	0	4	14	20.2222	1	1	0	0	0	1	0	0	0	1	0	3	0	1	5
10	16	0	1	1	1	5	3	4	4	0	1	0	0	1	1	0	0	0	0	0	1	0	0	2	5	3	0	0	0	0	5	10	19.4711	1	1	0	0	0	1	0	0	0	0	0	2	0	0	3
11	16	0	1	1	1	2	2	4	3	0	1	0	0	0	0	0	1	0	0	0	1	0	0	4	5	3	0	0	0	0	5	12	21.6413	1	1	0	0	0	1	0	0	0	1	0	3	0	1	2
12	15	1	1	1	1	3	5	4	4	0	3	2	2	2	0	2	2	2	0	1	2	0	0	2	1	3	0	0	0	0	4	6	18.3391	1	1	0	0	0	1	0	0	0	1	1	1	1	0	15
13	17	1	1	1	1	4	4	3	3	0	0	0	0	0	0	0	0	0	0	0	1	0	0	2	3	3	0	0	0	0	4	8	22.5606	2	1	0	0	0	1	0	0	0	0	0	1	1	0	0
14	15	1	1	1	1	4	4	5	5	0	0	3	1	0	3	0	0	0	0	0	2	0	0	2	4	5	0	0	0	0	4	11	19.7245	1	1	0	0	0	1	0	0	0	0	0	2	0	0	7
15	18	1	1	2	1	3	3	5	5	0	0	3	0	0	0	1	0	0	0	0	1	0	0	2	3	3	0	1	0	0	5	8	20.1362	3	1	0	0	0	0	1	0	0	0	0	1	1	0	4
16	16	0	1	1	1	4	4	3	3	0	1	1	3	3	0	2	2	0	2	0	2	1	1	3	3	2	0	0	0	0	3	8	20.8711	1	1	0	0	0	1	0	0	0	0	0	1	1	0	14
17	15	0	1	1	1	3	3	4	4	0	2	2	1	1	2	0	1	2	1	1	2	1	1	3	3	2	0	0	0	0	3	8	20.7008	1	1	0	0	0	1	0	0	0	0	0	1	1	0	12
18	16	0	1	1	1	4	4	5	5	0	1	0	1	0	1	0	0	0	0	0	2	0	0	3	5	1	0	0	0	0	4	9	20.5457	1	1	0	0	0	1	0	0	0	0	0	2	0	0	3
19	16	0	1	1	1	4	5	3	3	0	2	1	0	2	0	0	0	0	0	0	1	0	0	3	3	3	0	0	0	0	4	9	19.2894	1	1	0	0	0	1	0	0	0	0	0	2	0	0	5
20	16	0	1	2	0	3	4	4	3	0	0	0	0	0	0	0	0	0	0	0	1	0	0	3	3	3	0	0	0	0	3	9	20.3857	1	1	0	0	0	0	1	0	0	0	0	2	0	0	0
21	15	0	1	2	1	2	5	1	2	0	0	0	0	0	0	0	0	0	0	0	1	0	0	1	1	5	0	0	0	0	5	7	18.7637	1	1	0	0	0	0	1	0	0	0	0	1	1	0	0
22	15	0	1	1	0	4	3	4	3	0	0	1	0	2	1	0	2	1	2	0	3	0	1	3	1	2	0	0	0	0	3	6	18.8189	1	1	0	0	0	1	0	0	0	1	0	1	1	0	9
23	16	1	1	2	0	3	4	4	4	0	3	0	0	0	0	0	0	0	0	0	1	0	0	4	2	2	0	0	0	0	3	8	22.6667	1	1	0	0	0	0	1	0	0	0	0	1	1	0	3
24	15	0	1	1	1	1	3	5	5	0	2	0	0	1	0	1	0	0	0	0	1	0	0	1	4	4	0	0	0	0	4	9	21.4844	1	1	0	0	0	1	0	0	0	0	0	2	0	0	4
25	15	1	1	2	1	4	4	4	5	0	2	0	0	0	0	0	0	0	0	0	1	0	0	2	1	2	0	0	0	0	5	5	20.7612	1	1	0	0	0	0	1	0	0	0	0	1	1	0	2
26	16	1	1	2	1	4	2	4	3	0	2	2	1	0	1	0	2	0	0	1	3	0	0	1	5	5	0	0	1	0	2	11	18.2262	1	1	0	0	0	0	1	0	0	1	1	2	0	0	8
27	17	0	1	2	1	1	2	1	2	0	1	1	0	0	0	0	0	0	0	0	1	0	0	3	5	4	0	0	1	0	4	12	22.2667	2	1	0	0	0	0	1	0	0	1	1	3	0	1	2
28	16	0	1	1	1	4	4	4	4	0	0	0	0	0	0	0	0	0	0	0	1	0	0	3	5	4	0	0	0	1	3	12	20.992	1	1	0	0	0	1	0	0	0	1	0	3	0	1	0
29	16	0	1	1	0	3	4	3	2	0	0	0	0	0	2	1	1	2	0	0	2	0	0	1	1	5	0	0	0	0	4	7	18.9386	1	1	0	0	0	1	0	0	0	1	1	1	1	0	6
30	16	0	1	1	1	3	4	4	4	0	0	0	1	0	3	0	0	0	0	0	2	0	0	4	4	3	0	0	0	0	4	11	20.1873	1	1	0	0	0	1	0	0	0	0	0	2	0	0	4
31	16	0	1	2	1	2	5	2	4	0	1	0	3	1	0	0	0	0	0	1	1	0	0	4	5	5	0	0	0	0	5	14	21.4112	1	1	0	0	0	0	1	0	0	0	0	3	0	1	5
32	14	0	1	1	1	1	5	4	1	1	1	1	0	0	0	0	0	1	1	0	1	0	0	2	2	3	0	0	0	0	5	7	18.0994	1	1	0	0	0	1	0	0	0	0	0	1	1	0	4
33	16	1	1	3	1	4	4	4	4	0	1	0	1	1	1	1	0	2	0	0	1	0	0	2	3	4	0	0	0	0	4	9	18.1075	1	1	0	0	0	0	0	1	0	0	0	2	0	0	7
34	15	1	1	2	0	3	3	2	2	0	1	2	1	1	2	0	0	0	2	1	2	0	0	4	5	4	0	0	1	0	5	13	19.2837	1	1	0	0	0	0	1	0	0	0	0	3	0	1	9
35	16	1	1	1	1	2	2	3	2	1	2	2	0	0	0	0	0	0	0	0	1	0	0	4	5	5	0	0	0	0	5	14	22.0517	1	1	0	0	0	1	0	0	0	0	0	3	0	1	4
36	16	1	1	2	1	2	2	3	1	0	1	0	1	0	0	0	0	1	0	0	1	0	0	4	5	5	0	0	0	0	4	14	19.9003	1	1	0	0	0	0	1	0	0	0	0	3	0	1	3
37	15	1	1	2	1	3	2	4	4	0	1	0	0	0	0	0	0	0	0	0	1	0	0	4	4	5	0	0	0	0	4	13	19.8141	1	1	0	0	0	0	1	0	0	0	0	3	0	1	1
38	15	1	1	1	1	5	4	4	4	0	1	0	0	0	0	1	0	0	0	0	1	0	0	4	5	5	0	0	0	0	5	14	20.6035	1	1	0	0	0	1	0	0	0	0	0	3	0	1	2
39	15	0	2	2	1	4	4	4	4	0	2	3	1	0	0	0	2	0	0	0	2	0	0	4	5	4	0	0	0	0	5	13	20.1408	1	0	1	0	0	0	1	0	0	0	0	3	0	1	8
40	16	0	1	3	1	1	3	5	4	0	1	1	0	1	1	1	2	2	0	0	1	0	0	2	5	5	0	0	0	0	4	12	18.5124	1	1	0	0	0	0	0	1	0	1	1	3	0	1	9
41	16	0	1	3	1	2	4	5	5	0	2	0	1	1	2	0	1	0	0	0	2	0	0	4	4	3	0	1	0	0	3	11	19.1001	1	1	0	0	0	0	0	1	0	0	1	2	0	0	7
42	16	0	1	2	0	2	2	1	3	1	2	1	2	1	2	1	1	2	3	0	2	0	0	4	2	2	0	0	0	0	4	8	16.3725	1	1	0	0	0	0	1	0	0	0	0	1	1	0	15
43	15	0	1	2	1	4	4	3	3	0	1	1	2	1	1	1	1	1	1	1	2	1	0	4	3	2	0	0	0	0	4	9	21.6409	1	1	0	0	0	0	1	0	0	0	0	2	0	0	10
44	16	0	1	2	1	2	1	2	1	1	2	1	2	1	2	2	1	1	2	0	2	0	0	4	2	2	0	0	0	0	4	8	17.7999	1	1	0	0	0	0	1	0	0	0	0	1	1	0	14
45	15	0	1	2	1	3	3	3	2	1	1	2	2	3	1	0	3	1	0	1	3	0	0	3	2	1	0	0	1	0	2	6	15.9801	1	1	0	0	0	0	1	0	0	0	0	1	1	0	13
46	16	0	1	1	1	4	4	5	5	0	0	0	0	0	0	0	0	0	0	0	1	0	0	4	5	3	0	0	0	0	3	12	24.1415	1	1	0	0	0	1	0	0	0	0	0	3	0	1	0
47	15	0	1	2	1	3	2	3	2	0	2	0	0	0	0	2	0	0	0	0	1	0	0	4	5	4	0	0	0	0	5	13	19.1467	1	1	0	0	0	0	1	0	0	0	0	3	0	1	4
48	16	0	1	2	1	1	3	3	2	1	2	2	1	2	2	1	1	1	0	0	3	1	1	2	2	2	0	0	0	1	2	6	18.7432	1	1	0	0	0	0	1	0	0	1	1	1	1	0	12
49	16	0	1	2	1	3	3	3	1	1	2	0	0	0	0	0	2	0	0	0	1	0	0	4	5	4	0	0	0	0	3	13	20.7031	1	1	0	0	0	0	1	0	0	0	0	3	0	1	4
50	16	0	1	1	1	5	4	4	4	0	2	0	2	1	3	3	2	0	0	0	2	0	0	2	1	1	0	0	0	0	2	4	18.5733	1	1	0	0	0	1	0	0	0	1	0	1	1	0	13
51	14	0	1	2	1	4	5	5	5	0	1	1	2	1	1	0	0	2	0	0	2	0	0	3	3	1	0	0	0	0	3	7	18.1061	1	1	0	0	0	0	1	0	0	1	0	1	1	0	8
52	15	0	1	1	1	1	5	3	4	0	3	3	2	0	0	3	3	0	0	0	3	0	0	2	2	3	0	0	0	0	3	7	15.6197	1	1	0	0	0	1	0	0	0	0	0	1	1	0	14
53	15	0	1	3	1	2	4	4	4	0	0	0	0	0	0	0	0	0	0	0	1	0	0	1	3	4	0	0	0	0	3	8	20.753	1	1	0	0	0	0	0	1	0	0	0	1	1	0	0
54	19	0	1	2	1	5	2	3	1	0	3	2	0	1	0	3	0	0	0	1	2	0	0	4	5	3	0	0	0	0	3	12	24.3865	3	1	0	0	0	0	1	0	0	1	1	3	0	1	9
55	16	0	1	1	1	4	2	2	2	0	3	1	3	1	3	0	1	1	1	0	2	0	0	2	3	3	0	0	0	0	4	8	16.121	1	1	0	0	0	1	0	0	0	1	1	1	1	0	14
56	19	0	1	1	1	4	2	2	4	0	1	1	1	1	3	1	2	1	1	0	2	1	0	2	2	3	0	0	1	0	2	7	16.2323	3	1	0	0	0	1	0	0	0	1	1	1	1	0	12
57	15	0	1	2	1	4	2	5	3	0	2	2	1	1	1	0	1	0	0	0	2	0	0	2	5	5	0	0	0	0	3	12	20.0689	1	1	0	0	0	0	1	0	0	0	1	3	0	1	8
58	16	0	1	2	1	1	1	2	1	1	2	2	1	3	0	0	1	2	0	0	2	0	0	2	3	2	0	0	0	0	2	7	18.4265	1	1	0	0	0	0	1	0	0	1	0	1	1	0	11
59	16	0	1	2	1	1	3	3	3	1	3	1	0	2	2	1	2	0	0	0	3	0	0	2	3	4	0	1	1	0	2	9	18.2746	1	1	0	0	0	0	1	0	0	0	0	2	0	0	11
60	14	0	1	2	1	3	3	1	3	0	1	1	0	2	2	3	1	0	0	0	1	0	0	1	4	5	0	0	0	0	3	10	20.8061	1	1	0	0	0	0	1	0	0	0	0	2	0	0	10
61	15	0	1	1	1	1	3	3	1	1	2	1	1	1	1	1	2	1	0	0	1	0	0	4	3	4	0	0	0	0	5	11	19.052	1	1	0	0	0	1	0	0	0	0	0	2	0	0	10
62	16	0	1	1	0	2	2	3	3	0	1	1	1	0	1	0	0	0	0	0	1	0	0	3	4	3	0	0	0	0	5	10	23.4337	1	1	0	0	0	1	0	0	0	1	0	2	0	0	4
63	16	1	1	2	1	2	5	3	3	1	1	1	1	1	1	0	1	1	0	0	2	0	0	3	5	5	0	0	0	0	4	13	19.3772	1	1	0	0	0	0	1	0	0	0	0	3	0	1	7
64	15	0	1	1	1	2	3	3	3	0	0	1	1	0	0	0	1	0	0	0	2	0	0	4	3	2	0	0	0	0	2	9	21.4031	1	1	0	0	0	1	0	0	0	0	0	2	0	0	3
65	16	1	1	4	1	5	3	4	4	0	2	2	2	3	1	2	1	1	1	0	3	0	0	3	3	3	1	1	0	0	2	9	19.8962	1	1	0	0	0	0	0	0	1	1	1	2	0	0	15
66	15	1	1	2	1	4	4	4	4	0	1	1	3	2	0	1	1	0	0	0	1	0	0	1	3	2	0	0	0	0	4	6	17.0934	1	1	0	0	0	0	1	0	0	0	0	1	1	0	9
67	15	1	1	2	1	2	3	3	3	1	0	1	2	2	0	0	0	0	0	0	1	0	0	4	1	3	0	0	0	0	4	8	20.8117	1	1	0	0	0	0	1	0	0	0	0	1	1	0	5
68	16	1	1	4	1	3	1	3	3	1	2	1	1	2	1	2	0	0	0	0	2	0	0	1	2	2	0	0	1	0	3	5	19.8765	1	1	0	0	0	0	0	0	1	0	0	1	1	0	9
69	16	0	1	1	1	2	5	1	1	0	0	0	0	1	0	0	0	0	0	0	1	0	0	3	5	3	0	0	0	0	4	11	21.7993	1	1	0	0	0	1	0	0	0	1	0	2	0	0	1
70	15	0	1	1	1	4	4	4	3	0	1	1	0	0	0	0	0	0	0	0	1	0	0	3	4	3	0	0	0	0	5	10	20	1	1	0	0	0	1	0	0	0	0	0	2	0	0	2
71	16	0	1	2	1	1	5	4	3	0	0	1	0	2	0	0	0	0	0	0	1	0	0	4	5	5	0	0	0	0	5	14	20.1873	1	1	0	0	0	0	1	0	0	0	0	3	0	1	3
72	16	1	1	3	1	4	1	2	2	0	1	0	2	0	2	0	0	0	0	0	1	0	0	4	5	1	0	0	0	0	5	10	19.1003	1	1	0	0	0	0	0	1	0	1	0	2	0	0	5
73	15	0	1	1	1	3	4	4	4	0	3	1	2	0	0	0	0	1	0	0	1	0	0	4	3	3	0	0	0	0	4	10	17.7096	1	1	0	0	0	1	0	0	0	0	0	2	0	0	7
74	15	0	1	1	1	4	3	4	3	0	3	1	3	0	0	0	0	0	1	0	1	0	0	4	4	3	0	0	0	0	3	11	17.3333	1	1	0	0	0	1	0	0	0	0	0	2	0	0	8
75	14	0	1	1	1	4	4	5	5	0	1	2	2	2	0	2	2	0	2	0	1	0	0	4	3	2	0	0	0	0	3	9	16.2274	1	1	0	0	0	1	0	0	0	0	0	2	0	0	13
76	14	0	1	1	1	4	4	5	5	0	3	0	3	3	0	0	0	0	0	0	1	0	0	4	5	5	0	0	0	0	4	14	18.8561	1	1	0	0	0	1	0	0	0	0	0	3	0	1	9
77	14	1	1	1	1	2	5	4	3	0	1	0	0	1	0	1	0	0	0	0	1	0	0	2	3	2	0	0	0	0	4	7	22.1482	1	1	0	0	0	1	0	0	0	0	0	1	1	0	3
78	16	1	1	2	0	4	1	4	4	0	2	2	1	2	1	2	0	1	1	1	2	0	1	4	3	1	1	1	0	1	4	8	17.9999	1	1	0	0	0	0	1	0	0	0	0	1	1	0	12
79	15	0	1	2	0	2	5	4	3	0	1	2	0	2	3	0	0	0	0	0	2	0	0	4	5	1	0	0	0	0	3	10	19.7711	1	1	0	0	0	0	1	0	0	0	0	2	0	0	8
80	15	0	1	2	0	3	4	4	5	0	0	2	0	2	2	0	2	0	1	0	2	0	0	3	5	4	0	0	0	0	2	12	19.5312	1	1	0	0	0	0	1	0	0	1	0	3	0	1	9
81	15	1	1	2	0	5	5	4	4	0	0	1	1	0	2	0	0	0	0	0	1	0	0	4	5	1	0	0	0	0	4	10	23.1405	1	1	0	0	0	0	1	0	0	0	0	2	0	0	4
82	16	0	1	1	0	4	4	5	5	0	1	0	1	0	1	0	0	0	0	0	1	0	0	4	5	4	0	0	0	0	4	13	19.8914	1	1	0	0	0	1	0	0	0	0	0	3	0	1	3
83	16	0	1	2	0	3	2	2	2	0	1	1	1	1	1	1	0	0	0	0	1	0	0	4	5	5	0	0	0	0	5	14	18.6273	1	1	0	0	0	0	1	0	0	1	0	3	0	1	6
84	16	1	1	2	1	1	3	3	2	1	1	1	1	0	0	0	0	0	0	0	1	0	0	1	4	4	0	0	0	0	4	9	20.1408	1	1	0	0	0	0	1	0	0	0	0	2	0	0	3
85	15	0	1	2	1	2	5	3	2	0	1	3	1	0	1	0	0	1	0	0	1	0	0	2	5	5	0	0	0	0	4	12	19.563	1	1	0	0	0	0	1	0	0	0	0	3	0	1	7
86	15	1	1	2	1	1	1	1	1	1	0	0	1	1	0	0	0	0	0	0	1	0	0	3	5	5	0	0	0	0	3	13	19.5312	1	1	0	0	0	0	1	0	0	0	0	3	0	1	2
87	16	1	1	2	1	1	2	2	1	1	1	1	1	2	2	1	0	0	0	0	1	0	0	3	5	4	0	0	0	0	3	12	19.3548	1	1	0	0	0	0	1	0	0	0	0	3	0	1	8
88	15	0	1	1	1	4	4	4	4	0	2	1	0	0	0	3	0	0	0	0	1	0	0	4	5	5	0	1	0	0	3	14	21.5729	1	1	0	0	0	1	0	0	0	0	0	3	0	1	6
89	15	1	1	3	1	2	2	3	4	0	1	1	0	0	1	0	0	1	0	0	1	0	0	1	5	4	0	1	1	0	5	10	24.2187	1	1	0	0	0	0	0	1	0	1	0	2	0	0	4
90	15	0	1	2	1	4	4	2	3	0	0	1	0	2	0	0	0	0	0	0	1	0	0	4	5	5	0	0	0	0	5	14	20	1	1	0	0	0	0	1	0	0	0	0	3	0	1	3
91	14	0	1	1	1	4	4	5	5	0	0	1	2	2	0	0	0	0	0	0	1	0	0	4	3	3	0	0	0	0	4	10	19.4734	1	1	0	0	0	1	0	0	0	0	0	2	0	0	5
92	15	0	1	1	1	3	2	4	4	0	3	1	1	1	2	0	0	0	0	0	1	0	0	1	4	4	0	0	0	0	3	9	20.1197	1	1	0	0	0	1	0	0	0	0	0	2	0	0	8
93	15	1	1	3	1	3	3	2	2	1	2	1	1	1	1	1	1	1	1	0	1	0	0	2	4	3	0	0	0	0	4	9	19.0982	1	1	0	0	0	0	0	1	0	0	0	2	0	0	10
94	14	0	1	1	1	4	4	5	5	0	1	1	1	1	1	0	0	0	0	0	1	0	0	4	4	3	0	0	0	0	4	11	18.1791	1	1	0	0	0	1	0	0	0	0	0	2	0	0	5
95	15	1	1	2	0	4	5	5	5	0	0	1	1	1	1	1	0	0	0	0	1	0	0	4	5	4	0	1	1	0	4	13	17.9634	1	1	0	0	0	0	1	0	0	0	0	3	0	1	5
96	15	1	1	2	1	1	5	1	1	1	2	2	2	0	0	0	0	0	0	0	1	0	0	2	2	1	0	0	1	0	3	5	21.3593	1	1	0	0	0	0	1	0	0	0	1	1	1	0	6
97	15	0	1	2	1	4	4	5	5	1	1	0	0	0	0	0	0	0	0	0	1	0	0	4	3	5	0	0	0	0	4	12	21.2306	1	1	0	0	0	0	1	0	0	0	0	3	0	1	1
98	15	0	1	2	1	3	3	4	4	1	1	2	0	0	0	1	1	0	0	0	1	0	0	4	3	3	0	0	0	0	2	10	16.0145	1	1	0	0	0	0	1	0	0	0	0	2	0	0	5
99	16	1	1	1	0	5	5	5	5	0	0	1	0	0	0	0	0	0	0	0	1	0	0	4	5	3	0	0	0	0	5	12	19.5312	1	1	0	0	0	1	0	0	0	0	0	3	0	1	1
100	16	0	1	1	0	4	3	5	4	0	2	0	1	1	0	0	0	0	1	0	2	0	0	1	2	2	0	1	0	0	5	5	22.3133	1	1	0	0	0	1	0	0	0	0	1	1	1	0	5
101	16	0	1	3	0	4	5	4	4	0	0	0	0	0	0	0	1	0	0	0	1	0	0	2	5	4	0	0	0	0	5	11	22.5215	1	1	0	0	0	0	0	1	0	0	0	2	0	0	1
102	15	0	1	2	0	5	5	5	5	0	1	1	0	0	2	1	0	0	1	0	2	0	0	4	5	5	0	1	0	0	4	14	21.5556	1	1	0	0	0	0	1	0	0	0	0	3	0	1	6
103	15	0	1	1	0	5	2	3	4	0	3	3	2	0	0	0	0	0	0	1	2	0	0	2	5	4	0	0	0	0	5	11	19.9755	1	1	0	0	0	1	0	0	0	0	0	2	0	0	8
104	16	0	1	2	0	5	2	5	4	0	0	0	2	0	1	0	0	0	0	0	1	0	0	3	5	4	0	0	0	0	5	12	18.8189	1	1	0	0	0	0	1	0	0	0	0	3	0	1	3
105	15	0	1	2	0	2	2	5	4	0	0	0	0	1	0	0	0	0	0	0	1	0	0	2	5	4	0	0	0	0	5	11	20.202	1	1	0	0	0	0	1	0	0	0	0	2	0	0	1
106	15	0	1	2	0	5	5	2	4	0	3	2	1	2	2	3	0	1	0	0	2	0	1	4	2	2	0	0	0	0	3	8	16.7683	1	1	0	0	0	0	1	0	0	0	0	1	1	0	14
107	16	0	1	1	0	4	4	5	3	0	0	2	0	0	0	1	0	0	0	0	1	0	0	4	4	1	0	0	0	0	5	9	25.2343	1	1	0	0	0	1	0	0	0	0	0	2	0	0	3
108	16	0	1	1	1	1	4	4	3	0	3	1	3	0	0	0	1	0	0	0	1	0	0	4	2	2	1	0	1	0	5	8	21.7865	1	1	0	0	0	1	0	0	0	1	0	1	1	0	8
109	14	0	1	2	1	4	2	1	3	0	0	1	1	1	2	0	0	0	0	0	1	0	0	4	5	4	0	0	0	0	5	13	23.1562	1	1	0	0	0	0	1	0	0	0	0	3	0	1	5
110	16	0	1	3	1	4	4	5	5	0	1	1	1	1	1	0	0	0	0	0	1	0	0	4	5	4	0	0	0	0	5	13	20.753	1	1	0	0	0	0	0	1	0	0	0	3	0	1	5
111	16	0	1	2	1	5	5	3	2	1	0	1	1	2	2	0	0	0	0	0	1	0	0	3	4	1	0	0	0	0	3	8	20.9566	1	1	0	0	0	0	1	0	0	0	0	1	1	0	6
112	19	0	1	1	1	4	5	3	3	1	1	2	1	0	1	2	1	2	2	0	2	1	0	1	1	3	0	1	0	0	3	5	30.6293	3	1	0	0	0	1	0	0	0	1	1	1	1	0	12
113	17	0	1	1	1	4	4	5	3	0	1	2	2	0	1	1	1	0	0	0	2	0	0	4	5	5	0	0	0	0	5	14	19.2734	2	1	0	0	0	1	0	0	0	0	0	3	0	1	8
114	15	1	2	1	1	3	2	3	3	0	1	0	0	0	0	0	0	0	0	0	1	0	0	2	4	3	0	0	0	0	2	9	22.5586	1	0	1	0	0	1	0	0	0	0	0	2	0	0	1
115	14	0	1	2	1	2	2	3	3	0	0	0	0	0	0	0	3	0	0	0	1	0	0	4	3	4	0	0	0	0	4	11	18	1	1	0	0	0	0	1	0	0	1	0	2	0	0	3
116	15	0	1	3	1	3	4	5	5	0	1	1	0	0	0	0	0	0	0	0	1	0	0	4	3	3	0	0	0	0	3	10	20.635	1	1	0	0	0	0	0	1	0	0	0	2	0	0	2
117	15	0	1	2	1	4	3	3	2	0	0	0	0	0	0	0	0	0	0	0	1	0	0	1	1	3	0	0	0	0	2	5	21.1901	1	1	0	0	0	0	1	0	0	0	0	1	1	0	0
118	14	1	1	2	1	2	2	2	3	1	0	0	0	0	0	0	0	0	0	0	1	0	0	3	4	4	0	0	0	0	4	11	21.6713	1	1	0	0	0	0	1	0	0	0	0	2	0	0	0
119	15	0	1	3	1	3	3	1	1	0	0	0	0	0	0	0	0	0	0	0	1	0	0	3	5	3	0	0	0	0	3	11	21.3593	1	1	0	0	0	0	0	1	0	0	0	2	0	0	0
120	14	0	1	2	1	2	2	4	4	0	1	0	1	2	0	0	0	0	0	0	1	0	0	1	5	5	0	0	0	0	5	11	21.6797	1	1	0	0	0	0	1	0	0	0	0	2	0	0	4
121	16	0	1	1	1	1	4	4	4	0	0	0	0	0	0	0	0	0	0	0	1	0	0	3	4	3	0	0	0	0	5	10	21.7187	1	1	0	0	0	1	0	0	0	0	1	2	0	0	0
122	15	1	1	3	1	3	3	5	3	0	2	2	0	1	1	1	1	0	0	0	2	0	0	4	2	1	0	0	0	0	3	7	18.9198	1	1	0	0	0	0	0	1	0	0	1	1	1	0	8
123	15	0	1	1	1	4	4	5	3	0	0	0	1	0	0	1	0	0	0	0	1	0	0	2	5	4	0	0	0	0	5	11	20.4444	1	1	0	0	0	1	0	0	0	0	0	2	0	0	2
124	15	0	1	1	1	4	3	4	2	0	1	1	2	0	0	0	0	1	0	0	1	0	1	2	5	4	0	0	0	0	3	11	20.3856	1	1	0	0	0	1	0	0	0	1	1	2	0	0	5
125	15	1	1	1	1	3	3	5	4	1	1	1	0	0	0	0	0	0	0	0	1	0	0	3	3	5	0	1	0	0	5	11	20.1956	1	1	0	0	0	1	0	0	0	1	0	2	0	0	2
126	15	0	1	1	1	4	4	4	2	1	0	0	0	0	1	0	0	0	0	0	1	0	0	3	5	5	0	0	0	0	4	13	20.5693	1	1	0	0	0	1	0	0	0	1	0	3	0	1	1
127	16	1	1	1	1	1	5	2	1	0	1	1	0	0	0	0	0	0	0	0	1	0	0	2	2	4	0	0	0	0	4	8	20.7031	1	1	0	0	0	1	0	0	0	1	1	1	1	0	2
128	16	0	1	1	1	2	3	1	3	0	1	0	1	0	0	0	0	1	1	0	1	0	0	4	3	5	0	0	0	0	4	12	23.4566	1	1	0	0	0	1	0	0	0	1	0	3	0	1	4
129	15	0	1	1	1	3	3	4	4	0	2	1	0	0	0	0	0	1	0	0	1	0	0	4	5	5	0	0	0	0	5	14	20.202	1	1	0	0	0	1	0	0	0	1	0	3	0	1	4
130	15	0	1	3	1	1	1	1	3	1	2	0	0	0	1	1	0	0	0	0	1	0	0	2	5	5	0	0	0	0	5	12	20.2538	1	1	0	0	0	0	0	1	0	0	1	3	0	1	4
131	15	0	1	3	1	5	2	4	1	0	2	1	1	1	0	0	0	0	0	0	1	0	0	4	5	5	0	0	0	0	5	14	22.9218	1	1	0	0	0	0	0	1	0	0	0	3	0	1	5
132	15	1	1	1	1	4	3	4	2	1	2	1	0	0	0	1	0	0	0	0	1	0	0	4	5	5	0	0	0	0	4	14	19.7266	1	1	0	0	0	1	0	0	0	0	0	3	0	1	4
133	15	0	1	1	1	3	4	3	3	0	0	0	0	1	0	0	0	0	0	0	1	0	0	4	5	5	0	0	0	0	5	14	20.3125	1	1	0	0	0	1	0	0	0	1	0	3	0	1	1
134	15	1	1	1	1	4	4	4	4	0	0	1	1	0	1	0	0	0	1	0	1	0	0	2	5	4	0	0	0	0	4	11	20.4695	1	1	0	0	0	1	0	0	0	0	0	2	0	0	4
135	16	0	1	1	1	4	4	3	2	0	2	3	1	0	0	0	2	0	0	0	1	0	0	4	4	3	0	0	0	0	3	11	20.6297	1	1	0	0	0	1	0	0	0	0	0	2	0	0	8
136	15	1	1	4	1	4	5	5	1	0	0	0	0	0	0	0	0	0	0	0	1	0	0	3	5	5	0	0	0	0	4	13	20.753	1	1	0	0	0	0	0	0	1	0	0	3	0	1	0
137	15	1	1	1	1	4	5	5	1	0	0	0	0	0	0	0	0	0	0	0	1	0	0	3	5	1	0	1	0	0	5	9	20.7612	1	1	0	0	0	1	0	0	0	0	0	2	0	0	0
138	15	0	1	1	1	5	3	5	5	0	3	3	2	3	1	1	1	1	0	1	2	0	0	2	2	3	0	0	0	0	2	7	18.9386	1	1	0	0	0	1	0	0	0	1	0	1	1	0	15
139	16	0	1	1	1	4	3	3	2	0	2	3	1	0	3	2	0	0	0	0	4	0	0	4	3	2	0	1	0	0	2	9	22.137	1	1	0	0	0	1	0	0	0	0	1	2	0	0	11
140	15	0	1	2	0	3	5	1	4	0	3	3	0	0	3	0	1	0	2	1	2	1	1	1	2	1	0	0	0	0	4	4	18.7111	1	1	0	0	0	0	1	0	0	0	1	1	1	0	12
141	15	0	1	2	0	2	5	3	2	0	1	1	0	1	1	0	1	1	0	0	1	0	0	1	5	3	0	0	0	0	3	9	20.3254	1	1	0	0	0	0	1	0	0	1	0	2	0	0	6
142	15	0	1	1	0	4	5	4	3	0	0	0	1	1	1	1	0	0	0	0	1	0	0	4	5	5	0	0	0	0	5	14	20.2291	1	1	0	0	0	1	0	0	0	0	0	3	0	1	4
143	15	0	1	2	0	2	2	3	3	0	0	1	1	1	2	0	1	2	0	0	2	0	0	2	3	3	0	0	0	0	3	8	18.4592	1	1	0	0	0	0	1	0	0	1	1	1	1	0	8
144	15	1	1	2	0	4	4	5	5	0	1	0	1	1	2	0	0	0	0	0	1	0	0	4	5	5	0	0	0	0	5	14	19.0071	1	1	0	0	0	0	1	0	0	0	0	3	0	1	5
145	15	1	1	2	1	4	4	5	5	0	1	0	1	1	0	0	0	0	0	0	1	0	0	4	5	5	0	0	0	0	5	14	19.1282	1	1	0	0	0	0	1	0	0	0	0	3	0	1	3
146	15	1	1	1	0	4	3	5	4	0	0	2	0	0	0	0	0	0	2	0	1	0	0	2	5	5	0	0	0	0	5	12	20.5078	1	1	0	0	0	1	0	0	0	0	0	3	0	1	4
147	15	0	1	2	0	3	3	3	3	0	1	2	0	3	2	1	0	1	0	0	3	0	0	1	3	1	0	0	0	0	3	5	18.6268	1	1	0	0	0	0	1	0	0	1	0	1	1	0	10
148	16	0	1	1	0	4	2	5	4	0	1	1	1	2	2	2	0	0	0	0	1	0	0	4	5	3	0	0	0	0	4	12	19.8058	1	1	0	0	0	1	0	0	0	0	0	3	0	1	9
149	15	0	1	2	0	4	4	5	5	0	0	0	1	0	0	0	0	0	0	0	1	0	0	4	5	3	0	0	0	0	5	12	22.2222	1	1	0	0	0	0	1	0	0	0	0	3	0	1	1
150	16	1	1	2	0	4	3	5	4	0	1	1	0	2	0	1	0	0	0	0	1	0	0	4	2	5	0	0	0	0	5	11	19.7975	1	1	0	0	0	0	1	0	0	1	0	2	0	0	5
151	15	1	1	1	1	4	3	4	3	0	2	0	0	0	0	0	0	0	0	0	1	0	0	3	4	3	0	0	0	0	4	10	28.1633	1	1	0	0	0	1	0	0	0	0	0	2	0	0	2
152	16	1	1	4	0	4	5	5	5	1	0	3	0	0	0	0	0	0	0	0	1	0	0	4	5	1	0	1	0	0	2	10	22.9334	1	1	0	0	0	0	0	0	1	1	0	2	0	0	3
153	15	1	1	4	0	2	5	5	5	1	1	1	1	1	2	0	0	0	0	0	1	0	0	1	4	5	0	1	0	0	5	10	19.415	1	1	0	0	0	0	0	0	1	1	0	2	0	0	6
154	15	1	1	1	0	3	5	4	4	0	1	3	1	1	0	1	0	1	0	0	1	0	0	3	3	4	0	1	0	0	4	10	18.4724	1	1	0	0	0	1	0	0	0	1	0	2	0	0	8
155	16	0	1	2	0	3	2	5	4	0	1	0	3	1	2	0	1	0	0	0	2	0	0	4	5	3	0	0	0	0	4	12	23.7088	1	1	0	0	0	0	1	0	0	1	0	3	0	1	8
156	16	1	1	2	0	2	5	2	2	0	1	0	0	0	0	0	0	0	0	0	1	0	0	2	2	5	0	0	0	0	4	9	19.4674	1	1	0	0	0	0	1	0	0	0	0	2	0	0	1
157	16	1	1	2	1	2	2	3	3	0	1	1	3	0	1	0	0	0	0	0	2	0	0	3	4	1	0	0	1	0	4	8	19.3792	1	1	0	0	0	0	1	0	0	0	0	1	1	0	6
158	16	0	1	2	1	2	5	2	2	0	2	2	1	1	1	0	0	0	0	0	1	0	0	3	2	5	0	0	0	0	3	10	23.2434	1	1	0	0	0	0	1	0	0	0	0	2	0	0	7
159	16	0	1	2	1	3	5	5	5	0	3	1	1	1	2	0	2	2	1	0	2	0	0	4	3	2	0	0	0	0	2	9	16.0231	1	1	0	0	0	0	1	0	0	0	0	2	0	0	13
160	16	0	1	2	1	4	4	5	5	0	2	2	0	1	0	0	0	0	0	0	1	0	0	2	5	3	0	0	0	0	4	10	24.1588	1	1	0	0	0	0	1	0	0	0	0	2	0	0	5
161	16	0	1	2	1	4	5	5	3	0	0	1	0	2	3	2	0	2	0	0	2	0	0	4	5	3	0	0	0	0	4	12	20.5693	1	1	0	0	0	0	1	0	0	0	0	3	0	1	10
162	15	0	1	2	1	5	4	5	3	0	0	1	2	1	1	0	1	1	1	0	1	0	0	4	5	5	0	0	0	0	4	14	18.7305	1	1	0	0	0	0	1	0	0	1	0	3	0	1	8
163	16	1	1	2	1	1	1	3	3	0	1	0	1	0	0	2	0	0	0	0	1	0	0	2	5	3	0	0	1	0	2	10	18.8281	1	1	0	0	0	0	1	0	0	1	0	2	0	0	4
164	15	0	1	1	1	4	3	3	2	0	3	0	1	1	0	0	0	3	0	0	1	0	0	1	5	3	0	0	0	0	3	9	23.3598	1	1	0	0	0	1	0	0	0	0	0	2	0	0	8
165	15	0	1	1	1	5	3	3	4	0	1	0	0	1	1	0	1	0	0	0	1	0	0	4	5	5	0	1	0	0	4	14	18.3655	1	1	0	0	0	1	0	0	0	1	1	3	0	1	4
166	17	1	1	1	1	4	4	3	2	0	1	1	1	1	0	1	0	0	0	0	1	0	0	2	2	2	0	0	0	0	4	6	18.0277	2	1	0	0	0	1	0	0	0	0	1	1	1	0	5
167	15	0	1	1	1	3	3	4	1	1	1	2	0	0	0	0	0	0	0	0	1	0	0	2	2	4	0	1	0	0	3	8	26.4792	1	1	0	0	0	1	0	0	0	0	0	1	1	0	3
168	16	0	1	1	1	3	2	4	3	0	1	0	1	1	0	1	2	0	0	0	2	0	0	2	3	2	0	0	0	0	3	7	22.3437	1	1	0	0	0	1	0	0	0	0	1	1	1	0	6
169	18	0	1	1	1	1	1	2	1	1	2	2	2	2	0	0	0	0	0	0	1	0	0	3	4	4	0	0	0	0	3	11	23.4375	3	1	0	0	0	1	0	0	0	0	0	2	0	0	8
170	15	0	1	2	1	4	3	3	2	0	0	0	0	1	0	1	0	1	0	0	1	0	0	2	4	3	0	0	0	0	4	9	19.0098	1	1	0	0	0	0	1	0	0	0	0	2	0	0	3
171	18	0	1	3	1	3	3	3	3	1	1	1	1	1	1	1	0	0	0	0	1	0	0	1	5	3	0	0	0	0	4	9	24.653	3	1	0	0	0	0	0	1	0	1	0	2	0	0	6
172	15	1	1	2	1	3	3	4	4	0	3	1	1	2	1	2	2	1	2	0	2	0	0	3	2	2	0	0	1	0	3	7	19.6444	1	1	0	0	0	0	1	0	0	0	0	1	1	0	15
173	14	0	1	2	1	1	1	2	2	1	1	0	3	2	3	2	0	3	0	0	2	0	0	1	3	3	0	0	0	0	3	7	18.4444	1	1	0	0	0	0	1	0	0	0	1	1	1	0	14
174	17	0	1	1	1	1	1	1	2	0	0	1	0	1	0	0	1	1	0	0	1	0	0	2	4	3	0	0	0	0	4	9	24.7781	2	1	0	0	0	1	0	0	0	0	1	2	0	0	4
175	16	1	1	1	1	2	5	3	3	0	0	0	0	1	1	0	1	0	0	0	1	0	0	2	3	3	0	1	0	0	4	8	17.2902	1	1	0	0	0	1	0	0	0	1	0	1	1	0	3
176	16	1	1	1	1	4	4	5	3	0	1	1	0	0	1	0	0	0	0	0	1	0	0	4	2	3	0	0	0	0	5	9	19.7266	1	1	0	0	0	1	0	0	0	0	0	2	0	0	3
177	15	1	1	2	1	1	1	3	2	1	1	1	0	0	0	0	1	1	0	0	1	0	0	3	5	4	0	0	0	0	5	12	18.3655	1	1	0	0	0	0	1	0	0	0	0	3	0	1	4
178	19	0	2	1	1	4	5	4	3	0	0	1	1	1	0	1	0	1	0	0	1	0	0	4	4	3	0	0	0	0	4	11	18.4542	3	0	1	0	0	1	0	0	0	1	1	2	0	0	5
179	17	1	2	2	1	3	3	3	1	1	1	1	0	1	1	0	1	2	0	0	2	0	0	4	2	3	0	1	1	0	3	9	20.0474	2	0	1	0	0	0	1	0	0	1	0	2	0	0	7
180	15	0	2	3	1	4	4	4	4	0	0	1	1	1	2	0	0	3	2	0	4	0	0	2	5	1	0	0	0	0	3	8	18.5224	1	0	1	0	0	0	0	1	0	1	0	1	1	0	10
181	15	0	2	3	1	5	4	4	4	0	0	0	0	0	0	0	0	0	0	0	1	0	0	4	5	5	0	0	0	0	5	14	20.6641	1	0	1	0	0	0	0	1	0	0	0	3	0	1	0
182	16	0	2	2	1	3	3	2	1	0	1	1	1	2	2	2	1	0	0	0	1	0	0	4	3	3	0	0	0	0	4	10	20.202	1	0	1	0	0	0	1	0	0	0	0	2	0	0	10
183	17	0	2	2	1	2	3	5	5	0	1	0	0	0	2	0	0	0	0	0	2	0	0	1	1	1	0	0	0	0	3	3	21.7447	2	0	1	0	0	0	1	0	0	0	0	1	1	0	3
184	16	1	2	2	1	1	1	1	1	1	2	2	0	1	0	0	0	0	0	0	1	0	0	3	3	3	0	0	1	0	4	9	17.2045	1	0	1	0	0	0	1	0	0	0	0	2	0	0	5
185	17	1	2	1	1	4	2	3	2	0	1	0	0	0	0	1	2	0	0	0	1	0	0	3	2	3	0	0	0	0	3	8	23.7118	2	0	1	0	0	1	0	0	0	0	1	1	1	0	4
186	18	0	2	1	1	1	2	3	3	1	1	0	1	0	2	0	0	0	1	1	2	0	0	2	5	4	0	0	0	0	3	11	15.0551	3	0	1	0	0	1	0	0	0	0	0	2	0	0	5
187	17	1	2	2	1	3	5	2	2	1	3	1	0	2	0	2	2	2	2	0	1	0	0	2	2	3	0	1	0	0	4	7	16.231	2	0	1	0	0	0	1	0	0	1	0	1	1	0	14
188	17	0	2	1	1	2	2	3	2	0	1	0	0	0	0	0	1	0	0	0	1	0	0	4	4	3	0	1	0	0	3	11	20.9781	2	0	1	0	0	1	0	0	0	0	0	2	0	0	2
189	18	1	2	2	1	5	5	2	4	0	1	0	1	0	0	0	0	0	0	0	1	0	0	2	5	5	0	0	0	0	3	12	20.4284	3	0	1	0	0	0	1	0	0	0	0	3	0	1	2
190	16	0	2	2	1	2	2	3	3	1	1	2	1	2	0	0	2	2	0	0	2	0	0	4	5	4	0	0	0	0	5	13	21.7778	1	0	1	0	0	0	1	0	0	0	0	3	0	1	10
191	16	1	2	3	1	1	2	4	3	0	1	0	1	1	1	0	1	0	0	0	1	0	0	4	4	5	0	0	0	0	4	13	19.7924	1	0	1	0	0	0	0	1	0	0	0	3	0	1	5
192	17	1	2	1	1	3	1	3	2	0	1	1	1	2	1	0	2	1	0	0	2	0	0	3	5	1	0	0	0	0	3	9	19.5312	2	0	1	0	0	1	0	0	0	1	1	2	0	0	9
193	16	0	2	1	1	5	3	4	4	0	1	2	0	1	0	0	1	1	2	1	2	0	0	2	5	1	0	1	0	0	5	8	17.4818	1	0	1	0	0	1	0	0	0	0	0	1	1	0	8
194	17	1	2	1	1	5	3	4	3	0	3	0	3	0	0	0	1	0	0	0	2	0	0	3	5	4	0	1	0	0	3	12	18.3737	2	0	1	0	0	1	0	0	0	0	0	3	0	1	7
195	17	0	2	3	1	3	3	5	5	0	1	1	0	0	3	0	1	3	1	0	2	0	0	2	2	3	0	0	0	0	5	7	26.8977	2	0	1	0	0	0	0	1	0	0	1	1	1	0	10
196	17	0	2	1	1	3	5	5	4	0	1	1	0	0	0	0	0	0	0	0	1	0	0	4	5	5	0	0	0	0	4	14	20.8666	2	0	1	0	0	1	0	0	0	0	0	3	0	1	2
197	17	0	2	1	1	4	4	5	5	0	1	0	0	0	0	0	2	0	0	0	1	0	0	4	5	5	0	0	0	0	5	14	21.7738	2	0	1	0	0	1	0	0	0	0	0	3	0	1	3
198	17	0	2	1	1	4	4	5	5	0	3	1	0	1	0	0	0	1	0	0	1	0	0	4	2	4	0	0	0	0	4	10	22.4766	2	0	1	0	0	1	0	0	0	0	0	2	0	0	6
199	17	0	2	3	1	4	2	5	4	0	1	0	2	1	0	0	0	0	0	0	3	0	0	1	2	1	0	0	0	0	5	4	19.0039	2	0	1	0	0	0	0	1	0	0	1	1	1	0	4
200	16	0	2	1	1	4	4	2	4	0	1	1	1	1	0	1	0	0	0	0	2	0	0	2	5	5	0	0	0	0	3	12	20.7512	1	0	1	0	0	1	0	0	0	0	1	3	0	1	5
201	16	0	2	1	1	4	4	4	4	0	2	1	1	1	1	0	0	0	0	0	1	0	0	4	5	5	0	0	0	0	5	14	19.7055	1	0	1	0	0	1	0	0	0	0	0	3	0	1	6
202	16	0	2	1	1	4	5	5	4	0	0	2	0	0	2	0	1	0	0	0	1	0	0	4	4	1	0	0	0	0	3	9	18.6981	1	0	1	0	0	1	0	0	0	0	0	2	0	0	5
203	17	0	2	2	1	3	3	2	3	0	1	2	0	0	0	0	1	0	0	0	2	0	0	4	5	3	0	0	0	0	3	12	18	2	0	1	0	0	0	1	0	0	0	1	3	0	1	4
204	17	1	2	2	1	4	4	4	4	0	0	0	0	0	1	0	0	1	0	0	1	0	0	3	2	3	0	0	0	0	4	8	17.4818	2	0	1	0	0	0	1	0	0	0	0	1	1	0	2
205	17	0	2	4	1	5	2	5	4	0	1	1	2	0	1	0	1	3	0	0	2	0	0	3	4	5	0	0	0	0	4	12	20.7311	2	0	1	0	0	0	0	0	1	1	0	3	0	1	9
206	17	0	2	3	1	4	2	4	3	0	2	3	1	1	0	2	2	2	1	1	2	0	0	1	1	2	0	0	0	0	2	4	18.1812	2	0	1	0	0	0	0	1	0	1	1	1	1	0	14
207	17	1	2	2	1	3	5	2	2	1	3	1	0	2	0	2	2	2	2	0	1	0	0	2	2	3	0	1	0	0	4	7	16.231	2	0	1	0	0	0	1	0	0	1	0	1	1	0	14
207	17	1	2	2	1	3	5	2	2	1	3	1	0	2	0	2	2	2	2	0	1	0	0	2	2	3	0	1	0	0	4	7	16.231	2	0	1	0	0	0	1	0	0	1	0	1	1	0	14
208	17	1	2	3	1	3	3	3	3	1	1	0	1	0	0	0	0	0	0	0	1	0	0	4	5	3	0	1	0	0	3	12	22.3111	2	0	1	0	0	0	0	1	0	1	0	3	0	1	2
209	18	1	2	2	1	4	4	4	4	0	1	1	0	0	0	1	2	1	0	1	2	0	0	4	5	3	0	1	1	0	3	12	20.0692	3	0	1	0	0	0	1	0	0	1	0	3	0	1	6
210	17	1	2	2	1	5	5	4	4	0	1	0	0	0	0	0	0	0	0	0	1	0	0	4	5	5	0	0	0	0	4	14	18.8504	2	0	1	0	0	0	1	0	0	0	0	3	0	1	1
211	18	1	2	2	1	2	5	2	3	0	1	0	0	0	0	0	0	1	0	0	1	0	0	2	3	3	0	0	0	0	4	8	22.2291	3	0	1	0	0	0	1	0	0	1	0	1	1	0	2
212	18	1	2	2	1	3	4	2	3	0	1	0	1	1	2	2	1	2	1	0	2	0	0	4	2	3	0	1	1	0	3	9	19.5918	3	0	1	0	0	0	1	0	0	1	0	2	0	0	11
213	17	0	2	2	1	4	4	5	5	0	1	0	0	0	0	2	0	1	1	0	2	0	0	1	5	5	0	0	0	0	3	11	17.2447	2	0	1	0	0	0	1	0	0	0	0	2	0	0	5
214	17	0	2	2	1	3	3	3	3	0	1	0	0	0	0	0	2	0	1	0	1	0	0	1	5	5	0	0	0	0	4	11	20.6174	2	0	1	0	0	0	1	0	0	1	0	2	0	0	4
215	17	1	2	2	1	3	5	2	2	1	3	1	0	2	0	2	2	2	2	0	1	0	0	2	2	3	0	1	0	0	4	7	16.231	2	0	1	0	0	0	1	0	0	1	0	1	1	0	14
216	17	0	2	2	1	1	1	3	3	1	2	1	2	1	2	1	1	2	3	0	2	0	0	4	3	3	0	0	1	0	5	10	18.0994	2	0	1	0	0	0	1	0	0	0	0	2	0	0	15
217	17	1	2	2	1	3	3	3	2	1	1	1	1	1	1	1	2	0	0	0	1	0	0	3	2	2	0	1	1	0	4	7	20.7031	2	0	1	0	0	0	1	0	0	0	0	1	1	0	8
218	17	0	2	1	1	1	5	4	3	0	1	0	2	1	1	0	0	0	0	0	1	0	0	1	1	3	0	0	1	0	3	5	21.1477	2	0	1	0	0	1	0	0	0	1	0	1	1	0	5
219	18	1	2	2	1	2	4	4	4	0	2	1	1	2	3	0	1	1	0	0	2	0	0	3	2	2	0	1	0	0	4	7	18.6095	3	0	1	0	0	0	1	0	0	1	1	1	1	0	11
220	17	0	2	2	1	2	3	3	4	0	2	1	1	2	1	2	1	0	0	0	2	0	0	4	2	3	0	1	1	0	4	9	17.7856	2	0	1	0	0	0	1	0	0	1	1	2	0	0	10
221	17	1	2	3	1	2	2	3	2	0	1	1	1	2	1	1	1	0	0	0	2	0	0	1	3	5	0	0	0	0	3	9	20.3254	2	0	1	0	0	0	0	1	0	0	0	2	0	0	8
222	17	1	2	1	1	3	3	3	2	0	1	0	0	0	0	1	1	0	0	0	1	0	0	2	5	1	0	0	0	0	3	8	21.3039	2	0	1	0	0	1	0	0	0	0	0	1	1	0	3
223	17	1	2	2	1	2	3	3	3	0	0	0	0	0	1	0	0	0	0	0	1	0	0	4	5	3	0	1	1	0	4	12	20.898	2	0	1	0	0	0	1	0	0	0	0	3	0	1	1
224	16	0	2	2	1	3	2	4	2	0	0	1	0	0	0	1	0	1	0	0	1	0	0	2	5	4	0	0	0	0	4	11	21.7923	1	0	1	0	0	0	1	0	0	0	1	2	0	0	3
225	16	1	2	3	1	1	5	3	3	1	0	0	0	0	0	0	2	0	0	0	1	0	0	3	5	4	0	0	0	0	4	12	18.7305	1	0	1	0	0	0	0	1	0	0	0	3	0	1	2
226	16	0	2	2	1	4	3	4	3	0	2	1	1	1	1	2	2	0	0	0	1	0	0	4	3	1	0	0	0	0	5	8	18.9386	1	0	1	0	0	0	1	0	0	1	0	1	1	0	10
227	16	0	2	2	1	4	4	4	4	0	0	0	2	0	0	1	1	1	1	0	1	0	0	1	1	3	0	0	0	0	4	5	22.3081	1	0	1	0	0	0	1	0	0	0	0	1	1	0	6
228	17	1	2	1	1	4	4	5	4	0	1	1	3	1	0	0	0	0	0	0	2	0	0	4	3	3	0	1	0	0	3	10	18.4375	2	0	1	0	0	1	0	0	0	1	0	2	0	0	6
229	16	1	2	1	1	3	3	4	4	0	2	1	3	1	3	1	2	1	0	0	4	0	1	2	3	2	0	1	0	0	3	7	16.3265	1	0	1	0	0	1	0	0	0	1	0	1	1	0	14
230	17	0	2	2	1	3	5	5	1	0	1	1	1	1	0	0	2	0	0	0	1	0	0	4	2	1	0	0	0	0	3	7	22.6667	2	0	1	0	0	0	1	0	0	0	0	1	1	0	6
231	17	1	2	2	1	4	3	4	3	0	1	1	0	0	0	0	1	0	0	0	1	0	0	3	2	5	0	0	0	0	5	10	17.6309	2	0	1	0	0	0	1	0	0	1	0	2	0	0	3
232	16	0	2	2	1	2	2	5	4	0	1	0	2	1	0	0	0	0	0	0	1	0	0	4	5	3	0	0	0	0	4	12	19.1111	1	0	1	0	0	0	1	0	0	0	0	3	0	1	4
233	16	1	2	1	1	4	5	5	5	0	1	0	1	1	1	0	0	0	0	0	1	0	0	2	5	3	0	0	0	0	5	10	17.6447	1	0	1	0	0	1	0	0	0	0	0	2	0	0	4
234	16	0	2	3	1	3	3	1	2	1	2	2	1	1	1	0	0	0	0	0	1	0	0	2	5	4	0	0	0	0	5	11	21.4667	1	0	1	0	0	0	0	1	0	0	0	2	0	0	7
235	16	0	2	1	1	3	5	4	3	0	1	1	0	0	3	0	1	1	1	0	2	0	0	2	5	3	0	0	0	0	4	10	22.8928	1	0	1	0	0	1	0	0	0	0	0	2	0	0	8
236	17	0	2	3	1	1	2	4	4	0	1	2	1	1	0	1	1	0	0	0	1	0	0	3	3	5	0	0	0	0	5	11	23.3536	2	0	1	0	0	0	0	1	0	0	0	2	0	0	7
237	17	0	2	2	1	2	4	4	4	0	2	2	1	1	0	0	0	0	0	0	1	0	0	3	1	4	0	0	0	0	4	8	18.0078	2	0	1	0	0	0	1	0	0	0	0	1	1	0	6
238	17	1	2	1	1	3	3	2	2	1	1	1	2	1	1	1	2	0	0	0	1	0	0	3	3	3	0	0	0	0	3	9	20.0773	2	0	1	0	0	1	0	0	0	0	0	2	0	0	9
239	17	0	2	1	1	2	2	3	4	0	2	0	0	0	0	0	0	1	1	0	1	0	0	1	4	3	0	1	0	0	3	8	22.2656	2	0	1	0	0	1	0	0	0	0	0	1	1	0	4
240	17	0	2	1	1	3	2	4	3	0	2	1	1	1	1	2	1	0	0	0	1	0	0	4	4	5	0	0	0	0	3	13	30.854	2	0	1	0	0	1	0	0	0	0	0	3	0	1	9
241	17	0	2	2	1	4	4	4	4	0	2	2	2	0	0	0	2	0	1	1	2	0	1	1	5	5	0	1	0	0	2	11	20.9366	2	0	1	0	0	0	1	0	0	0	0	2	0	0	9
242	17	0	2	3	1	4	4	5	5	0	1	0	0	1	1	2	1	1	0	0	1	0	0	4	5	5	0	0	0	0	2	14	23.7088	2	0	1	0	0	0	0	1	0	1	0	3	0	1	7
243	17	0	2	3	1	3	4	4	4	0	1	1	0	0	0	0	0	1	0	0	1	0	0	4	5	1	0	0	0	0	4	10	21.6441	2	0	1	0	0	0	0	1	0	1	0	2	0	0	3
244	18	0	2	1	1	3	2	1	1	0	1	0	1	1	1	1	2	2	0	0	1	0	0	4	4	3	0	0	0	0	3	11	23.6295	3	0	1	0	0	1	0	0	0	0	0	2	0	0	9
245	18	0	2	3	1	5	2	3	4	0	1	0	3	0	1	0	0	1	0	0	2	0	0	1	5	1	0	0	0	0	4	7	18.4425	3	0	1	0	0	0	0	1	0	0	1	1	1	0	6
246	18	0	2	1	1	2	2	3	2	0	1	2	1	2	1	2	0	0	0	0	1	0	0	2	4	5	0	0	0	0	5	11	17.894	3	0	1	0	0	1	0	0	0	0	0	2	0	0	9
247	18	0	2	2	1	2	2	4	3	0	1	1	0	0	0	0	0	0	0	0	1	0	0	2	5	4	0	0	0	0	5	11	21.1457	3	0	1	0	0	0	1	0	0	0	0	2	0	0	2
248	17	1	2	2	1	5	2	2	3	1	2	3	1	2	1	2	2	0	2	1	3	1	0	4	2	3	0	1	0	0	2	9	18.6961	2	0	1	0	0	0	1	0	0	1	0	2	0	0	15
249	17	0	2	2	1	3	3	2	3	0	0	0	1	0	0	0	0	0	0	0	1	0	0	2	5	5	0	0	0	0	2	12	19.8791	2	0	1	0	0	0	1	0	0	0	0	3	0	1	1
250	18	0	2	2	1	1	2	2	1	0	1	0	2	1	0	0	0	1	0	0	2	0	0	2	5	4	0	0	0	0	4	11	21.1863	3	0	1	0	0	0	1	0	0	1	1	2	0	0	5
251	17	0	2	1	1	5	3	4	5	0	1	0	1	2	1	1	1	0	0	0	1	0	0	2	5	4	0	0	0	0	5	11	25.5457	2	0	1	0	0	1	0	0	0	0	0	2	0	0	7
252	18	0	2	1	1	3	1	2	1	1	2	0	2	1	1	0	1	0	0	0	2	0	0	4	5	3	0	0	0	0	4	12	20.3856	3	0	1	0	0	1	0	0	0	1	0	3	0	1	7
253	17	0	2	3	1	3	2	4	4	0	0	0	0	1	0	0	0	0	0	0	1	0	0	4	3	3	0	0	0	0	5	10	24.2792	2	0	1	0	0	0	0	1	0	0	0	2	0	0	1
254	17	1	2	2	1	3	3	5	5	0	1	0	2	2	1	0	0	0	0	0	1	0	0	3	3	3	0	0	0	0	3	9	22.1453	2	0	1	0	0	0	1	0	0	1	1	2	0	0	6
255	17	1	2	2	1	1	3	1	1	1	1	2	2	1	1	1	0	0	0	0	1	0	0	2	5	3	0	0	0	0	4	10	20.7008	2	0	1	0	0	0	1	0	0	0	1	2	0	0	8
256	18	0	2	2	1	2	1	1	2	0	1	0	0	1	0	0	0	0	0	0	2	0	0	1	5	4	0	0	0	0	3	10	21.0828	3	0	1	0	0	0	1	0	0	0	0	2	0	0	2
257	18	1	2	1	1	1	1	1	1	1	1	0	1	1	1	0	3	0	1	0	2	0	0	4	4	5	0	0	0	0	4	13	16.3721	3	0	1	0	0	1	0	0	0	0	0	3	0	1	8
258	17	1	2	2	1	2	3	3	2	1	1	0	2	2	1	0	3	0	0	0	2	0	0	3	2	3	0	1	1	0	3	8	20.0623	2	0	1	0	0	0	1	0	0	0	0	1	1	0	9
259	17	0	2	1	1	1	4	3	3	1	3	2	0	1	0	0	0	0	0	0	2	0	0	1	5	3	0	0	0	0	4	9	24.9778	2	0	1	0	0	1	0	0	0	0	0	2	0	0	6
260	17	1	2	2	1	2	3	4	4	0	1	1	0	2	1	2	1	0	0	0	1	0	0	4	3	4	0	0	0	0	5	11	24.841	2	0	1	0	0	0	1	0	0	0	0	2	0	0	8
261	17	1	2	2	1	4	5	3	2	0	1	0	0	1	0	0	0	0	0	0	2	0	0	1	5	3	0	0	0	0	3	9	20.0288	2	0	1	0	0	0	1	0	0	0	0	2	0	0	2
262	17	1	2	2	1	1	1	1	1	1	2	0	2	2	0	0	3	1	0	0	2	0	0	4	3	2	0	0	0	0	3	9	15.0394	2	0	1	0	0	0	1	0	0	0	0	2	0	0	10
263	17	0	2	1	1	1	1	2	3	0	1	2	1	0	0	0	0	0	0	0	1	0	0	2	5	5	0	0	0	0	2	12	20.0773	2	0	1	0	0	1	0	0	0	0	0	3	0	1	4
264	17	1	2	1	1	3	5	4	4	0	1	0	1	3	2	0	1	3	1	0	4	1	0	3	3	2	0	1	0	0	2	8	19.3452	2	0	1	0	0	1	0	0	0	1	1	1	1	0	12
265	17	1	2	2	1	3	5	2	2	1	3	1	0	2	0	2	2	2	2	0	1	0	0	2	2	3	0	1	0	0	4	7	16.231	2	0	1	0	0	0	1	0	0	1	0	1	1	0	14
266	16	0	2	1	1	3	3	2	2	0	0	0	1	0	0	0	1	0	0	0	1	0	0	2	3	5	0	0	0	0	2	10	19.5312	1	0	1	0	0	1	0	0	0	0	0	2	0	0	2
267	16	0	2	1	1	5	5	3	2	0	1	1	1	1	1	1	2	0	1	1	2	0	1	4	2	3	0	0	0	0	3	9	18.843	1	0	1	0	0	1	0	0	0	1	0	2	0	0	9
268	17	1	2	2	1	4	4	1	3	0	1	0	0	0	0	0	1	0	0	0	1	0	0	3	5	3	0	0	0	0	5	11	20.679	2	0	1	0	0	0	1	0	0	1	0	2	0	0	2
269	17	0	2	4	1	4	4	5	4	1	0	0	0	0	1	0	0	0	0	0	1	0	0	3	3	3	0	0	0	0	3	9	19.5371	2	0	1	0	0	0	0	0	1	0	0	2	0	0	1
270	16	1	2	2	1	3	3	3	4	0	1	0	2	2	1	0	0	0	0	0	1	0	0	4	4	3	0	0	1	0	3	11	21.2878	1	0	1	0	0	0	1	0	0	0	0	2	0	0	6
271	17	0	2	2	1	4	4	5	4	0	2	1	0	2	3	0	3	2	0	0	2	0	0	2	2	1	0	0	0	0	3	5	17.6708	2	0	1	0	0	0	1	0	0	0	1	1	1	0	13
272	18	0	2	2	1	3	2	4	3	0	1	2	1	2	2	2	2	0	2	1	2	0	1	1	2	3	0	0	0	0	3	6	17.5767	3	0	1	0	0	0	1	0	0	1	1	1	1	0	14
273	18	1	2	1	1	3	5	4	3	0	0	0	0	0	0	1	0	0	0	0	1	0	0	2	3	1	0	0	0	0	5	6	22.1367	3	0	1	0	0	1	0	0	0	0	0	1	1	0	1
274	16	1	2	3	1	3	5	4	3	0	2	0	0	0	2	0	0	0	0	0	1	0	0	3	5	5	0	0	0	0	5	13	20.4675	1	0	1	0	0	0	0	1	0	1	0	3	0	1	4
275	17	1	2	4	1	4	2	4	2	0	2	0	0	0	0	0	0	0	1	0	1	0	0	2	3	2	0	0	0	0	4	7	23.5883	2	0	1	0	0	0	0	0	1	1	0	1	1	0	3
276	18	1	2	2	1	1	1	2	1	1	3	3	0	1	0	0	1	1	0	0	2	0	0	3	4	3	0	0	0	0	5	10	16.8889	3	0	1	0	0	0	1	0	0	0	1	2	0	0	9
277	18	0	2	2	1	1	1	2	1	1	3	3	1	2	0	0	1	1	0	0	2	0	0	3	3	3	0	0	0	0	3	9	18.1641	3	0	1	0	0	0	1	0	0	1	0	2	0	0	11
278	16	0	2	2	1	1	2	2	1	0	1	2	0	1	0	0	0	1	0	0	2	0	0	1	4	5	0	0	0	0	3	10	18.3143	1	0	1	0	0	0	1	0	0	1	1	2	0	0	5
279	16	0	2	2	1	1	2	3	3	1	3	3	1	2	0	0	0	0	0	0	2	0	0	2	4	3	0	0	0	0	3	9	19.3548	1	0	1	0	0	0	1	0	0	1	0	2	0	0	9
280	16	0	2	1	1	3	3	3	3	0	2	0	2	1	1	1	1	0	0	0	2	0	0	4	5	5	0	0	0	0	3	14	19.437	1	0	1	0	0	1	0	0	0	0	0	3	0	1	8
281	17	1	2	2	1	1	5	1	2	0	2	1	1	2	1	1	1	1	1	0	2	0	0	3	2	3	0	0	0	0	3	8	19.721	2	0	1	0	0	0	1	0	0	1	1	1	1	0	11
282	16	1	2	2	1	4	3	5	4	0	1	1	2	2	1	1	1	0	0	0	1	0	0	4	5	5	0	0	0	0	4	14	18.6328	1	0	1	0	0	0	1	0	0	1	0	3	0	1	9
283	16	0	2	2	1	4	4	5	3	0	2	1	2	1	2	0	1	0	0	0	1	0	0	4	3	4	0	0	0	0	3	11	18.7813	1	0	1	0	0	0	1	0	0	0	0	2	0	0	9
284	16	0	2	2	1	2	5	3	2	1	1	0	2	1	1	1	1	1	0	0	1	0	0	4	5	5	0	0	0	0	5	14	17.2265	1	0	1	0	0	0	1	0	0	0	1	3	0	1	8
285	16	1	2	2	1	3	3	2	2	0	1	1	2	3	1	2	3	1	0	0	2	0	0	4	2	2	0	0	0	0	4	8	17.3743	1	0	1	0	0	0	1	0	0	0	0	1	1	0	14
286	18	1	2	2	1	2	2	4	3	0	2	0	1	1	1	0	1	3	1	0	1	0	0	4	3	3	0	0	0	0	5	10	21.3778	3	0	1	0	0	0	1	0	0	0	0	2	0	0	10
287	17	0	2	2	1	4	4	4	3	0	3	2	1	1	0	0	3	2	1	0	1	0	0	3	2	1	0	0	0	0	4	6	18.0994	2	0	1	0	0	0	1	0	0	0	0	1	1	0	13
288	18	1	2	2	1	3	3	1	1	1	2	2	0	1	0	0	3	1	2	0	1	0	0	2	2	1	0	0	1	0	4	5	19.2837	3	0	1	0	0	0	1	0	0	0	1	1	1	0	11
289	18	0	2	3	1	5	2	5	3	0	2	3	1	0	0	2	1	2	1	1	2	1	1	4	3	3	0	0	0	0	4	10	16.7126	3	0	1	0	0	0	0	1	0	1	1	2	0	0	12
290	17	0	2	1	1	1	4	4	3	0	3	2	3	0	3	2	0	1	1	0	3	1	0	4	2	2	0	0	0	0	4	8	16.7588	2	0	1	0	0	1	0	0	0	0	1	1	1	0	15
291	18	1	2	2	1	2	5	3	3	0	1	1	0	0	0	0	0	0	0	0	1	0	0	4	5	5	0	0	0	0	4	14	17.6327	3	0	1	0	0	0	1	0	0	0	0	3	0	1	2
292	17	0	2	3	1	1	3	3	1	1	1	0	1	1	1	1	1	1	0	0	1	0	0	4	5	5	0	0	0	0	3	14	22.0604	2	0	1	0	0	0	0	1	0	0	0	3	0	1	7
293	18	0	2	2	1	4	5	3	2	1	2	3	2	1	1	1	1	1	0	0	1	0	0	4	2	1	0	0	0	0	5	7	16.875	3	0	1	0	0	0	1	0	0	0	0	1	1	0	12
294	16	0	2	2	1	1	5	2	3	1	3	3	1	2	1	2	1	1	1	0	2	0	0	2	2	3	0	0	0	0	3	7	19.3548	1	0	1	0	0	0	1	0	0	1	0	1	1	0	15
295	16	0	2	3	1	3	5	5	3	0	0	0	3	2	1	0	2	0	0	1	2	0	0	2	2	3	0	0	0	0	4	7	20.2706	1	0	1	0	0	0	0	1	0	0	1	1	1	0	8
296	18	1	2	3	1	4	5	5	5	0	0	0	0	0	0	0	1	0	0	0	1	0	0	4	3	3	0	0	0	0	5	10	23.8754	3	0	1	0	0	0	0	1	0	0	0	2	0	0	1
297	18	0	2	3	1	5	4	4	3	0	1	0	0	0	0	1	2	0	0	0	1	0	0	3	3	4	0	0	0	0	5	10	21.3281	3	0	1	0	0	0	0	1	0	0	0	2	0	0	4
298	17	0	2	1	1	3	3	4	1	1	1	2	2	1	1	1	0	0	0	0	1	0	0	1	5	5	0	0	0	0	4	11	22.8889	2	0	1	0	0	1	0	0	0	0	0	2	0	0	8
299	18	0	2	2	0	4	4	5	5	0	0	0	0	3	0	0	0	0	0	0	1	0	0	2	3	3	0	0	0	0	5	8	19.3266	3	0	1	0	0	0	1	0	0	0	0	1	1	0	3
300	16	0	2	1	0	5	5	4	4	0	1	2	2	2	3	1	2	0	2	1	2	0	1	4	2	3	0	0	0	0	3	9	18.5178	1	0	1	0	0	1	0	0	0	0	0	2	0	0	15
301	16	1	2	1	0	4	4	5	5	0	2	1	0	1	1	2	0	0	0	0	2	0	0	4	5	4	0	0	0	0	3	13	17.7274	1	0	1	0	0	1	0	0	0	1	0	3	0	1	7
302	16	0	2	2	0	4	2	5	4	0	1	0	2	2	2	0	0	1	2	0	1	0	0	1	2	1	0	0	0	0	4	4	18.4425	1	0	1	0	0	0	1	0	0	0	0	1	1	0	10
303	16	0	2	2	0	2	5	3	2	0	1	1	0	0	0	0	0	0	0	0	1	0	0	1	5	3	0	0	0	0	5	9	26.0375	1	0	1	0	0	0	1	0	0	0	0	2	0	0	2
304	16	0	2	2	0	2	2	1	1	0	1	0	0	2	3	0	0	0	0	0	1	0	0	1	1	3	0	0	0	0	1	5	24.0238	1	0	1	0	0	0	1	0	0	0	0	1	1	0	6
305	16	0	2	2	0	3	2	4	4	0	1	1	2	2	3	1	2	0	2	0	2	0	0	4	3	3	0	0	0	1	3	10	17.2421	1	0	1	0	0	0	1	0	0	0	0	2	0	0	14
306	17	1	2	4	0	1	4	3	2	0	0	1	1	0	0	1	0	1	0	0	1	0	0	1	3	3	0	0	0	0	3	7	18.5491	2	0	1	0	0	0	0	0	1	0	1	1	1	0	4
307	17	0	2	1	0	1	1	1	1	1	1	0	0	1	0	1	0	0	0	0	1	0	0	4	3	3	0	0	0	0	5	10	19.8828	2	0	1	0	0	1	0	0	0	0	0	2	0	0	3
308	17	1	2	3	0	3	4	3	5	0	1	0	1	1	2	1	0	2	1	0	2	0	0	1	3	3	0	0	0	0	3	7	20.3092	2	0	1	0	0	0	0	1	0	1	1	1	1	0	9
309	18	1	2	2	0	3	3	2	3	1	1	0	0	3	1	0	3	2	0	0	3	0	0	4	2	2	0	0	0	0	3	8	18.0662	3	0	1	0	0	0	1	0	0	0	0	1	1	0	10
310	17	1	2	1	0	3	3	3	2	0	0	0	1	0	0	0	0	0	0	0	1	0	0	2	2	3	0	0	0	0	4	7	18.1661	2	0	1	0	0	1	0	0	0	0	0	1	1	0	1
311	17	1	2	1	0	2	3	3	2	0	1	2	2	1	1	0	0	0	0	0	1	0	0	1	3	3	0	0	0	0	5	7	20.5496	2	0	1	0	0	1	0	0	0	0	0	1	1	0	7
312	18	0	2	1	1	4	4	3	2	0	1	2	2	2	0	0	2	2	2	0	2	1	1	4	2	1	0	1	0	0	2	7	18.0859	3	0	1	0	0	1	0	0	0	0	0	1	1	0	13
313	16	0	2	3	0	3	3	1	2	0	1	1	3	2	1	0	0	0	1	0	2	0	0	1	2	2	0	0	0	0	3	5	20.7031	1	0	1	0	0	0	0	1	0	0	0	1	1	0	9
314	16	0	2	1	0	3	3	2	3	0	1	0	2	1	1	0	2	0	0	0	1	0	0	1	5	4	0	1	0	0	4	10	20.4164	1	0	1	0	0	1	0	0	0	0	0	2	0	0	7
315	18	0	2	1	0	4	4	3	4	0	2	2	1	1	1	2	1	1	2	0	2	0	1	2	2	2	0	0	0	0	2	6	18.5901	3	0	1	0	0	1	0	0	0	1	0	1	1	0	13
316	17	0	2	2	1	2	2	2	1	0	0	0	1	0	0	0	0	0	0	0	1	0	0	4	3	3	0	0	0	0	3	10	19.0625	2	0	1	0	0	0	1	0	0	0	1	2	0	0	1
317	17	0	2	2	0	1	2	1	1	0	0	0	0	1	0	0	0	0	0	0	1	0	0	1	3	5	0	0	0	0	4	9	20.5499	2	0	1	0	0	0	1	0	0	0	0	2	0	0	1
318	18	1	2	2	1	4	4	3	3	0	3	1	2	2	1	1	3	1	1	1	2	1	1	4	2	3	0	0	0	0	5	9	19.5473	3	0	1	0	0	0	1	0	0	1	1	2	0	0	15
319	18	1	2	2	0	2	3	4	2	0	0	1	1	2	1	0	1	2	0	0	1	0	0	4	5	4	0	1	0	0	3	13	17.184	3	0	1	0	0	0	1	0	0	0	0	3	0	1	8
320	16	0	2	2	0	1	1	1	2	1	1	0	2	1	1	1	1	1	0	0	1	0	0	4	5	5	0	0	0	0	5	14	20.7666	1	0	1	0	0	0	1	0	0	0	0	3	0	1	8
321	16	0	2	2	0	4	4	5	5	0	3	3	0	1	0	0	1	0	0	0	2	0	0	2	4	3	0	0	0	0	4	9	16.911	1	0	1	0	0	0	1	0	0	0	0	2	0	0	8
322	17	0	2	1	0	3	5	5	3	0	2	1	2	1	2	0	0	0	0	0	1	0	0	4	5	5	0	0	0	0	4	14	21.4453	2	0	1	0	0	1	0	0	0	0	0	3	0	1	8
323	18	0	2	2	0	3	3	4	3	0	3	2	1	2	1	1	2	1	2	1	2	1	1	4	2	3	0	0	0	0	3	9	18.6395	3	0	1	0	0	0	1	0	0	1	1	2	0	0	15
324	17	1	2	2	0	4	4	4	5	0	2	2	2	1	1	0	0	0	0	0	1	0	0	1	5	3	0	0	1	0	4	9	20.9396	2	0	1	0	0	0	1	0	0	0	0	2	0	0	8
325	17	0	2	2	1	3	3	3	4	0	1	1	1	2	1	0	1	1	2	0	4	1	0	3	3	2	0	1	0	0	3	8	19.5092	2	0	1	0	0	0	1	0	0	1	1	1	1	0	10
326	18	1	3	1	0	3	5	5	5	0	1	0	1	0	0	0	0	0	0	0	1	0	0	4	2	4	0	0	0	0	4	10	20.0046	3	0	0	1	0	1	0	0	0	0	0	2	0	0	2
327	18	1	3	2	1	1	1	2	3	1	3	1	1	2	2	0	3	0	0	0	2	0	0	3	4	1	0	1	1	0	2	8	24.9904	3	0	0	1	0	0	1	0	0	0	0	1	1	0	12
328	17	1	3	1	0	4	4	5	5	0	1	0	0	0	0	0	0	0	0	0	1	0	0	1	3	3	0	0	0	0	3	7	20.1408	2	0	0	1	0	1	0	0	0	0	0	1	1	0	1
329	16	0	3	2	0	5	2	5	4	0	0	1	1	1	3	0	3	1	0	0	2	0	0	4	2	1	0	0	0	0	4	7	22.3569	1	0	0	1	0	0	1	0	0	0	0	1	1	0	10
330	17	1	3	3	0	5	4	4	5	0	1	1	0	0	1	0	1	0	0	0	1	0	0	4	4	5	0	0	0	0	5	13	23.7118	2	0	0	1	0	0	0	1	0	0	0	3	0	1	4
331	17	1	3	2	0	4	5	5	5	0	3	1	3	0	1	0	0	0	0	0	2	0	0	3	5	5	0	0	0	0	3	13	19.1327	2	0	0	1	0	0	1	0	0	0	0	3	0	1	8
332	17	0	3	2	0	2	5	3	2	0	1	0	1	0	0	0	0	0	0	0	1	0	0	4	5	5	0	0	0	0	5	14	19.1406	2	0	0	1	0	0	1	0	0	0	0	3	0	1	2
333	18	0	3	2	1	3	3	4	4	0	3	1	2	1	2	1	1	1	1	1	2	1	1	4	2	3	0	0	0	0	3	9	15.7336	3	0	0	1	0	0	1	0	0	0	0	2	0	0	13
334	17	0	3	2	0	2	5	4	2	0	1	0	0	0	0	0	0	0	0	0	1	0	0	4	5	5	0	0	0	0	5	14	21.1203	2	0	0	1	0	0	1	0	0	0	0	3	0	1	1
335	17	0	3	3	0	4	5	5	4	0	1	2	0	1	1	0	1	2	1	1	2	1	1	4	2	3	0	1	0	0	5	9	19.5556	2	0	0	1	0	0	0	1	0	0	0	2	0	0	9
336	18	0	3	1	0	4	5	4	3	0	1	0	1	0	1	0	0	0	0	0	2	0	0	1	5	5	0	1	0	0	2	11	18.132	3	0	0	1	0	1	0	0	0	0	0	2	0	0	3
337	17	0	3	1	1	2	2	4	3	0	1	2	3	1	1	3	1	2	1	0	2	1	0	4	4	4	0	1	0	0	3	12	26.1719	2	0	0	1	0	1	0	0	0	0	1	3	0	1	15
338	18	0	3	1	0	4	4	3	3	0	1	3	1	0	1	2	1	0	0	1	2	0	1	2	2	2	0	0	0	0	4	6	20.6667	3	0	0	1	0	1	0	0	0	0	0	1	1	0	9
339	18	1	3	1	0	4	4	4	3	0	3	1	3	0	0	0	0	0	0	0	1	0	0	4	5	5	0	0	0	0	5	14	21.4031	3	0	0	1	0	1	0	0	0	0	0	3	0	1	7
340	18	0	3	1	1	3	3	5	5	0	1	2	0	2	1	0	2	2	2	1	2	1	1	4	2	2	0	1	0	0	4	8	15.8203	3	0	0	1	0	1	0	0	0	1	0	1	1	0	12
341	18	0	3	1	0	4	4	5	5	0	2	2	2	1	1	2	2	1	1	0	2	0	0	2	2	3	0	1	0	0	2	7	17.2879	3	0	0	1	0	1	0	0	0	0	1	1	1	0	14
342	17	0	3	1	0	4	5	4	3	0	2	2	3	0	1	0	0	0	0	0	1	0	0	2	3	3	0	0	0	0	4	8	20.4294	2	0	0	1	0	1	0	0	0	0	0	1	1	0	8
343	17	0	3	2	0	4	5	3	2	0	1	0	0	1	1	1	0	0	0	0	1	0	0	1	1	4	0	0	0	0	4	6	19.1467	2	0	0	1	0	0	1	0	0	0	0	1	1	0	4
344	17	1	3	4	1	2	2	3	3	0	1	1	2	2	0	0	0	0	0	0	1	0	0	4	5	5	0	0	0	0	5	14	24.6755	2	0	0	1	0	0	0	0	1	0	0	3	0	1	6
345	17	0	3	1	1	3	3	4	4	0	0	0	0	0	0	0	0	0	0	0	1	0	0	4	5	5	0	0	0	0	3	14	20.9566	2	0	0	1	0	1	0	0	0	1	0	3	0	1	0
346	17	0	3	1	1	1	5	2	3	1	3	1	1	1	1	1	1	1	1	1	1	0	0	2	2	2	0	0	0	0	3	6	15.4315	2	0	0	1	0	1	0	0	0	0	0	1	1	0	11
347	18	1	3	2	1	2	3	2	3	0	1	1	1	0	1	0	2	0	0	1	1	0	0	4	5	4	0	0	1	0	3	13	30.3598	3	0	0	1	0	0	1	0	0	0	1	3	0	1	6
348	19	1	3	2	1	3	2	3	2	0	2	0	0	0	0	0	0	0	0	0	1	0	0	4	4	3	0	0	0	0	4	11	22.231	3	0	0	1	0	0	1	0	0	1	0	2	0	0	2
349	17	0	3	1	1	3	3	4	3	0	0	1	2	1	2	1	2	1	1	0	4	1	0	3	2	1	0	0	0	0	2	6	15.9001	2	0	0	1	0	1	0	0	0	0	0	1	1	0	11
350	17	0	3	2	1	2	3	4	3	0	0	1	1	1	1	1	1	1	0	0	1	0	0	2	3	2	0	0	0	0	3	7	16.5816	2	0	0	1	0	0	1	0	0	0	0	1	1	0	7
351	17	1	3	2	1	2	3	3	4	0	1	3	0	2	1	2	0	0	2	1	2	1	1	2	3	2	0	0	0	0	1	7	20.8304	2	0	0	1	0	0	1	0	0	1	1	1	1	0	11
352	17	0	3	1	1	5	4	3	3	0	2	2	2	0	0	2	2	0	1	0	2	1	0	4	2	1	0	0	0	0	4	7	20.5078	2	0	0	1	0	1	0	0	0	0	0	1	1	0	11
353	17	0	3	1	1	4	4	4	2	1	1	0	0	0	2	0	0	0	0	0	1	0	0	4	5	4	0	0	0	0	4	13	22.0324	2	0	0	1	0	1	0	0	0	0	0	3	0	1	3
354	17	0	3	1	1	4	4	4	4	0	1	1	0	1	0	0	0	0	0	0	1	0	0	2	3	3	0	0	1	0	5	8	19.8141	2	0	0	1	0	1	0	0	0	0	0	1	1	0	3
355	17	0	3	3	1	4	4	4	4	0	1	1	1	1	0	0	1	0	0	0	1	0	0	2	3	5	0	1	0	1	5	10	21.9532	2	0	0	1	0	0	0	1	0	0	0	2	0	0	5
356	17	1	3	1	1	5	5	1	1	1	1	0	0	0	0	0	0	0	0	0	1	0	0	4	5	5	0	0	0	0	4	14	18.2066	2	0	0	1	0	1	0	0	0	0	0	3	0	1	1
357	16	1	3	3	1	4	3	5	5	0	3	1	1	0	3	1	1	0	0	0	2	0	0	4	2	3	0	0	0	0	3	9	18.8566	1	0	0	1	0	0	0	1	0	1	0	2	0	0	10
358	17	0	3	1	1	2	2	4	4	0	1	0	0	1	1	0	0	0	0	1	1	0	0	4	5	4	0	1	0	0	5	13	21.7555	2	0	0	1	0	1	0	0	0	0	0	3	0	1	3
359	17	0	3	1	1	1	1	4	3	0	0	0	0	0	0	0	0	0	0	0	1	0	0	4	5	4	0	0	0	0	4	13	24.92	2	0	0	1	0	1	0	0	0	0	0	3	0	1	0
360	17	1	3	1	1	5	1	2	1	0	1	1	1	1	1	1	1	0	0	1	1	0	0	2	5	5	0	0	0	0	4	12	24.0766	2	0	0	1	0	1	0	0	0	0	0	3	0	1	7
361	17	0	3	2	1	2	5	4	5	0	3	0	1	2	0	0	0	0	0	0	2	0	0	4	5	1	0	0	0	0	4	10	17.0392	2	0	0	1	0	0	1	0	0	0	0	2	0	0	6
362	17	0	3	1	1	4	4	5	4	0	1	0	1	0	0	0	1	0	1	0	2	0	0	2	4	3	0	1	0	0	2	9	21.2111	2	0	0	1	0	1	0	0	0	1	0	2	0	0	4
363	18	0	3	3	1	4	4	4	4	0	3	3	1	0	0	1	2	0	0	0	2	0	0	4	2	2	0	1	0	0	3	8	19.1016	3	0	0	1	0	0	0	1	0	1	1	1	1	0	10
364	17	0	3	3	1	4	2	5	5	0	1	0	2	2	1	1	1	2	0	0	2	0	0	4	2	1	0	0	0	0	4	7	17.9851	2	0	0	1	0	0	0	1	0	0	0	1	1	0	10
365	18	1	3	1	1	5	4	4	4	0	1	1	0	0	1	0	1	1	0	0	2	0	0	4	5	4	0	0	0	0	4	13	19.0496	3	0	0	1	0	1	0	0	0	1	1	3	0	1	5
366	18	1	3	1	1	4	4	5	5	0	1	2	1	1	1	2	1	1	2	0	1	0	1	4	5	3	0	0	0	0	4	12	18.4965	3	0	0	1	0	1	0	0	0	1	0	3	0	1	12
367	17	0	3	3	1	5	4	5	4	0	1	1	0	1	0	0	0	0	0	0	1	0	0	4	5	5	0	0	0	0	5	14	19.7055	2	0	0	1	0	0	0	1	0	0	0	3	0	1	3
368	18	0	3	1	1	3	3	4	4	0	0	1	2	0	0	0	0	0	0	0	1	0	0	1	5	3	0	0	0	0	3	9	20.9572	3	0	0	1	0	1	0	0	0	0	0	2	0	0	3
369	18	1	3	1	1	2	3	2	3	0	0	0	3	1	0	0	0	0	0	0	1	0	0	1	4	2	0	0	0	0	5	7	19.257	3	0	0	1	0	1	0	0	0	0	0	1	1	0	4
370	17	1	3	1	1	5	3	2	3	1	1	3	1	0	0	1	0	0	0	0	2	0	0	3	5	1	0	0	0	0	4	9	16.598	2	0	0	1	0	1	0	0	0	1	0	2	0	0	6
371	18	1	3	3	1	5	4	4	3	0	1	0	0	0	0	0	0	0	0	0	1	0	0	3	3	3	0	0	0	0	5	9	19.7704	3	0	0	1	0	0	0	1	0	0	0	2	0	0	1
372	18	0	3	3	1	3	3	5	4	0	1	1	1	1	0	0	0	0	0	1	1	0	0	4	4	5	0	0	0	0	4	13	25.8997	3	0	0	1	0	0	0	1	0	1	0	3	0	1	4
373	17	0	3	3	1	5	4	3	4	0	3	1	0	1	1	0	0	0	0	0	2	0	0	4	5	5	0	0	0	0	3	14	18.7432	2	0	0	1	0	0	0	1	0	1	0	3	0	1	6
374	18	1	3	1	1	4	3	5	2	0	0	0	0	0	0	0	1	0	0	0	1	0	0	4	3	5	0	1	0	0	5	12	23.7966	3	0	0	1	0	1	0	0	0	0	0	3	0	1	1
375	18	1	3	3	1	3	2	4	4	0	2	1	2	1	1	1	0	0	0	0	2	0	0	4	5	5	0	0	0	0	4	14	21.9377	3	0	0	1	0	0	0	1	0	1	0	3	0	1	8
376	17	1	3	2	1	4	4	3	3	0	1	2	2	2	3	0	3	0	0	0	2	0	0	2	1	2	0	0	0	0	5	5	18.1662	2	0	0	1	0	0	1	0	0	0	0	1	1	0	13
377	17	0	3	3	1	4	4	5	5	0	3	1	2	1	2	0	2	0	0	0	1	0	0	4	3	3	0	1	0	0	3	10	18.1449	2	0	0	1	0	0	0	1	0	1	1	2	0	0	11
378	17	0	3	2	1	2	5	1	2	1	0	0	1	1	1	0	1	0	0	0	1	0	0	4	3	2	0	0	0	0	5	9	22.4813	2	0	0	1	0	0	1	0	0	0	0	2	0	0	4
379	17	0	3	1	0	2	5	4	3	0	0	1	2	1	1	0	1	0	0	0	1	0	0	4	5	5	0	0	0	0	4	14	22.6003	2	0	0	1	0	1	0	0	0	0	0	3	0	1	6
380	18	0	3	3	1	3	4	5	5	0	3	3	1	3	0	0	3	1	1	0	3	1	0	4	2	3	0	0	0	0	3	9	18.9453	3	0	0	1	0	0	0	1	0	1	0	2	0	0	15
381	16	1	3	2	0	2	5	4	3	0	1	1	1	0	1	0	2	0	0	0	2	0	0	4	5	5	0	0	0	0	5	14	23.4337	1	0	0	1	0	0	1	0	0	0	0	3	0	1	6
382	17	0	3	1	0	4	5	5	5	0	0	0	1	0	0	0	0	0	0	0	1	0	0	4	5	5	0	0	0	0	4	14	21.8522	2	0	0	1	0	1	0	0	0	0	0	3	0	1	1
383	17	0	3	2	0	3	3	4	4	0	2	0	2	2	1	1	1	1	0	1	2	0	1	2	2	1	0	0	0	0	1	5	18.3594	2	0	0	1	0	0	1	0	0	0	0	1	1	0	10
384	17	0	3	1	0	5	4	5	5	0	1	0	0	0	1	0	0	0	0	0	1	0	0	2	5	5	0	0	0	0	5	12	19.6511	2	0	0	1	0	1	0	0	0	0	0	3	0	1	2
385	18	0	3	1	0	4	4	5	5	0	1	1	0	0	0	0	0	0	0	0	1	0	0	4	5	5	0	1	0	0	5	14	25.4028	3	0	0	1	0	1	0	0	0	0	0	3	0	1	2
386	18	1	3	1	0	3	3	5	4	0	1	0	1	1	1	0	0	0	0	0	2	0	0	4	5	5	0	1	0	0	5	14	19.5988	3	0	0	1	0	1	0	0	0	0	0	3	0	1	4
387	17	1	3	2	0	2	2	3	2	0	0	1	1	1	1	0	1	1	0	1	2	0	0	2	4	2	0	0	0	0	3	8	17.0433	2	0	0	1	0	0	1	0	0	1	0	1	1	0	6
388	17	0	3	3	1	4	4	5	5	0	3	1	1	2	3	0	2	0	0	0	2	0	0	4	3	3	0	0	0	0	4	10	18.8649	2	0	0	1	0	0	0	1	0	1	0	2	0	0	12
389	17	0	3	2	0	3	3	3	4	0	0	1	2	1	1	0	0	1	0	0	2	0	0	4	5	5	0	0	0	0	4	14	18.9619	2	0	0	1	0	0	1	0	0	1	0	3	0	1	6
390	17	0	3	2	1	5	5	4	3	0	1	2	2	1	1	2	1	0	2	1	2	0	1	4	2	3	0	0	0	0	3	9	16.901	2	0	0	1	0	0	1	0	0	0	0	2	0	0	12
391	17	0	3	1	0	2	2	5	5	0	0	0	1	0	0	0	0	0	0	0	1	0	0	4	5	5	0	0	0	0	5	14	21.6441	2	0	0	1	0	1	0	0	0	0	0	3	0	1	1
392	18	0	3	2	0	2	5	4	3	0	2	0	1	0	1	1	1	0	0	0	1	0	0	4	5	5	0	0	0	0	5	14	19.7266	3	0	0	1	0	0	1	0	0	0	0	3	0	1	6
393	18	1	3	2	0	2	2	4	3	0	2	1	1	0	1	0	1	1	0	0	1	0	0	4	5	5	0	0	0	0	4	14	20.5078	3	0	0	1	0	0	1	0	0	0	0	3	0	1	7
394	17	0	3	2	1	2	2	4	4	0	1	1	2	1	0	1	1	2	1	1	3	0	1	4	2	3	0	0	0	0	3	9	17.5781	2	0	0	1	0	0	1	0	0	0	0	2	0	0	10
395	17	0	3	2	1	4	3	5	5	0	3	2	0	1	1	2	2	0	2	0	4	1	0	2	1	1	0	0	0	0	3	4	17.9089	2	0	0	1	0	0	1	0	0	1	1	1	1	0	13
396	17	0	3	1	1	4	2	5	4	0	2	1	3	1	3	1	0	1	2	0	1	0	0	4	3	3	0	0	0	0	4	10	19.0363	2	0	0	1	0	1	0	0	0	1	0	2	0	0	14
397	17	1	3	2	1	2	5	3	2	0	2	0	0	1	2	0	0	0	0	0	1	0	0	1	5	3	0	0	0	0	5	9	17.9012	2	0	0	1	0	0	1	0	0	0	0	2	0	0	5
398	17	1	2	2	1	3	5	2	2	1	3	1	0	2	0	2	2	2	2	0	1	0	0	2	2	3	0	1	0	0	4	7	16.231	2	0	1	0	0	0	1	0	0	1	0	1	1	0	14
399	17	0	3	1	1	3	4	5	5	0	1	0	0	1	1	1	1	3	0	0	2	0	0	4	1	5	0	0	0	0	5	10	20.4444	2	0	0	1	0	1	0	0	0	0	0	2	0	0	8
400	16	1	3	1	1	4	4	5	5	0	0	0	2	0	2	3	0	0	0	0	1	0	0	4	5	3	0	0	0	0	5	12	19.3792	1	0	0	1	0	1	0	0	0	0	0	3	0	1	7
401	17	1	3	1	1	4	4	5	5	0	0	0	1	0	0	0	0	0	0	0	1	0	0	1	5	1	0	0	0	0	4	7	19.8347	2	0	0	1	0	1	0	0	0	1	0	1	1	0	1
402	18	1	3	3	1	4	4	5	5	0	1	2	1	2	1	0	0	0	0	1	2	0	0	4	5	1	0	0	0	0	5	10	17.4747	3	0	0	1	0	0	0	1	0	0	0	2	0	0	7
403	17	0	3	2	1	2	5	4	4	0	0	0	2	1	0	0	0	0	0	0	2	0	0	4	5	5	0	0	0	0	3	14	18.6851	2	0	0	1	0	0	1	0	0	0	0	3	0	1	3
404	18	0	3	3	1	5	5	3	3	0	1	1	1	1	0	1	0	0	0	0	2	0	0	4	5	5	0	0	0	0	5	14	21.9138	3	0	0	1	0	0	0	1	0	0	0	3	0	1	5
405	18	1	3	1	1	4	3	5	4	0	3	0	1	0	0	0	0	1	0	0	1	0	0	4	5	5	0	0	0	0	5	14	23.1473	3	0	0	1	0	1	0	0	0	0	0	3	0	1	5
407	18	0	3	2	1	2	5	3	4	1	3	2	1	0	1	0	0	0	0	0	2	0	0	4	3	1	0	0	0	0	5	8	16.118	3	0	0	1	0	0	1	0	0	0	0	1	1	0	7
408	17	1	3	2	1	3	3	3	4	0	1	2	1	1	1	1	1	2	1	0	2	0	0	3	2	2	1	0	1	0	5	7	17.1849	2	0	0	1	0	0	1	0	0	1	1	1	1	0	11
409	18	1	3	4	1	3	4	3	4	0	2	1	0	1	1	2	2	1	0	0	2	0	0	2	2	3	0	0	1	0	5	7	18.4807	3	0	0	1	0	0	0	0	1	1	0	1	1	0	10
410	18	1	3	1	1	3	3	1	4	0	1	2	0	1	2	2	1	0	1	0	2	0	0	4	3	1	0	0	0	0	2	8	16.7126	3	0	0	1	0	1	0	0	0	0	1	1	1	0	10
411	18	0	3	1	1	3	3	4	3	0	1	1	1	1	1	2	2	2	1	0	2	0	0	2	2	3	0	0	0	0	3	7	18.5491	3	0	0	1	0	1	0	0	0	1	0	1	1	0	12
412	17	0	3	2	1	3	2	1	1	0	2	1	0	1	1	2	1	1	1	0	1	1	0	1	2	4	0	0	0	0	3	7	16.6374	2	0	0	1	0	0	1	0	0	0	0	1	1	0	10
413	18	1	3	2	1	1	1	1	1	1	0	2	1	2	0	2	1	1	1	0	2	0	0	3	3	3	0	0	0	0	4	9	19.1832	3	0	0	1	0	0	1	0	0	1	0	2	0	0	10
414	18	1	3	1	1	5	5	2	2	1	1	0	0	0	0	0	0	0	0	0	1	0	0	1	5	3	0	1	0	0	5	9	22.112	3	0	0	1	0	1	0	0	0	0	0	2	0	0	1
415	18	0	3	2	1	5	5	3	3	0	0	0	3	0	0	0	0	0	0	0	1	0	0	2	5	5	0	0	0	0	3	12	25.5588	3	0	0	1	0	0	1	0	0	0	0	3	0	1	3
416	18	0	3	1	1	2	2	3	3	0	2	2	2	2	0	2	2	0	0	0	2	1	0	3	3	3	0	1	0	0	3	9	18.1061	3	0	0	1	0	1	0	0	0	0	0	2	0	0	12
417	18	1	3	3	0	4	3	5	5	0	1	0	1	0	0	1	0	0	1	0	1	0	0	4	5	1	0	1	0	0	5	10	21.4619	3	0	0	1	0	0	0	1	0	0	0	2	0	0	4
418	19	0	3	1	0	2	2	4	3	0	1	0	1	0	0	0	0	1	0	0	1	0	0	4	5	5	0	0	0	0	4	14	20.7612	3	0	0	1	0	1	0	0	0	0	0	3	0	1	3
419	18	1	3	3	0	4	5	5	4	0	0	0	0	0	0	0	2	1	0	0	1	0	0	2	3	4	0	1	0	0	3	9	20.6193	3	0	0	1	0	0	0	1	0	1	1	2	0	0	3
420	17	1	3	1	0	4	3	5	4	0	0	0	2	0	1	0	1	0	0	0	1	0	0	3	3	4	0	0	0	0	4	10	22.0604	2	0	0	1	0	1	0	0	0	0	0	2	0	0	4
421	18	1	3	1	0	4	5	5	5	0	1	0	1	0	1	0	0	0	0	0	1	0	0	4	5	5	0	0	0	0	4	14	20.2336	3	0	0	1	0	1	0	0	0	0	0	3	0	1	3
422	18	1	3	1	0	4	5	5	1	0	1	1	1	1	0	1	1	1	0	0	2	0	0	2	4	3	0	1	0	0	3	9	19.1001	3	0	0	1	0	1	0	0	0	0	1	2	0	0	7
423	18	0	3	2	0	2	5	3	2	0	0	1	0	0	3	0	0	1	0	0	1	0	0	2	3	5	0	0	0	0	4	10	17.6471	3	0	0	1	0	0	1	0	0	0	0	2	0	0	5
424	18	1	3	2	0	3	5	5	4	0	1	0	0	1	0	1	2	1	1	1	2	0	0	4	3	5	0	0	0	0	2	12	15.1936	3	0	0	1	0	0	1	0	0	1	1	3	0	1	7
425	18	0	3	1	1	3	2	3	3	0	1	2	2	1	1	1	1	1	1	0	2	1	0	4	2	1	0	0	0	0	1	7	18.9473	3	0	0	1	0	1	0	0	0	0	1	1	1	0	11
426	19	0	3	4	1	5	5	2	1	1	2	2	3	0	1	2	1	2	0	1	4	0	1	3	2	2	0	0	0	0	3	7	18.1787	3	0	0	1	0	0	0	0	1	1	1	1	1	0	13
427	17	1	3	4	1	2	5	4	4	0	1	1	1	0	1	1	1	2	0	0	2	0	0	2	4	3	0	0	1	0	2	9	19.3792	2	0	0	1	0	0	0	0	1	1	1	2	0	0	8
428	17	1	3	3	1	4	5	5	5	0	2	1	2	0	1	0	1	3	1	0	4	0	0	3	3	3	0	0	0	0	5	9	18.2448	2	0	0	1	0	0	0	1	0	0	0	2	0	0	11
429	18	1	3	3	1	4	4	4	4	0	1	0	0	0	1	1	1	1	3	0	2	0	0	1	1	2	0	1	1	0	5	4	19.6052	3	0	0	1	0	0	0	1	0	1	1	1	1	0	8
430	18	0	3	1	1	5	5	2	2	1	0	0	1	0	3	0	2	1	0	0	1	0	0	2	2	3	0	1	0	0	4	7	18.0802	3	0	0	1	0	1	0	0	0	1	0	1	1	0	7
431	19	0	4	1	1	5	5	1	1	1	1	1	0	1	1	1	3	2	1	1	3	0	1	4	2	3	0	0	0	0	3	9	19.428	3	0	0	0	1	1	0	0	0	0	0	2	0	0	11
432	19	1	4	1	1	4	3	3	3	0	3	0	0	0	0	0	2	0	0	0	1	0	0	1	4	3	0	0	0	0	5	8	24.4141	3	0	0	0	1	1	0	0	0	1	0	1	1	0	5
433	19	1	4	1	1	3	3	5	5	0	1	2	1	2	0	0	3	0	0	0	1	0	0	3	4	2	0	1	0	0	5	9	19.7133	3	0	0	0	1	1	0	0	0	1	1	2	0	0	9
434	19	1	4	1	1	4	4	5	5	0	2	1	1	2	3	1	1	2	0	0	2	0	0	2	2	3	0	0	0	0	3	7	17.037	3	0	0	0	1	1	0	0	0	1	0	1	1	0	13
435	19	1	4	1	1	4	5	4	4	0	1	2	1	1	1	0	2	0	0	0	1	0	0	2	4	5	0	1	0	0	3	11	21.1827	3	0	0	0	1	1	0	0	0	1	0	2	0	0	8
436	18	1	4	1	1	2	2	4	4	0	1	2	2	1	2	1	1	1	0	1	2	0	1	2	3	3	0	0	0	0	4	8	18.8533	3	0	0	0	1	1	0	0	0	1	0	1	1	0	11
437	18	1	4	1	1	2	3	5	5	0	1	0	2	0	1	0	1	1	0	0	1	0	0	3	4	3	0	0	0	0	5	10	20.8416	3	0	0	0	1	1	0	0	0	0	0	2	0	0	6
438	18	1	4	1	1	2	5	4	3	0	1	2	1	1	1	0	0	0	0	0	1	0	0	2	3	4	0	0	0	0	2	9	21.3333	3	0	0	0	1	1	0	0	0	1	0	2	0	0	6
439	17	0	4	3	1	1	1	5	5	0	1	1	1	2	1	0	0	0	0	0	1	0	0	2	5	1	0	0	0	0	5	8	20.8949	2	0	0	0	1	0	0	1	0	0	0	1	1	0	6
440	18	0	4	1	1	1	1	2	2	0	2	3	1	0	2	0	0	0	0	0	2	0	0	3	5	1	0	1	0	0	5	9	20.3254	3	0	0	0	1	1	0	0	0	0	0	2	0	0	8
441	17	1	4	2	1	3	1	2	2	1	1	1	1	0	0	0	0	1	0	0	2	1	0	2	2	3	0	0	0	0	4	7	23.1834	2	0	0	0	1	0	1	0	0	0	1	1	1	0	4
442	19	1	4	3	1	3	3	1	3	1	0	1	0	0	0	1	2	2	1	0	1	0	0	1	5	5	0	0	0	0	5	11	20.3727	3	0	0	0	1	0	0	1	0	1	0	2	0	0	7
443	18	0	4	1	1	4	4	5	5	0	1	1	1	0	3	0	1	0	0	0	1	0	0	4	5	5	0	1	0	0	3	14	21.2874	3	0	0	0	1	1	0	0	0	0	0	3	0	1	7
444	18	1	4	1	1	5	4	3	3	0	2	2	1	1	1	0	0	0	0	0	1	0	0	4	5	5	0	1	0	0	5	14	20.1873	3	0	0	0	1	1	0	0	0	0	0	3	0	1	7
445	19	0	4	2	0	2	3	1	1	0	1	1	1	0	1	0	0	3	1	0	1	1	0	2	3	3	0	0	0	0	5	8	19.9792	3	0	0	0	1	0	1	0	0	1	0	1	1	0	8
446	18	0	4	1	0	4	4	5	5	0	2	1	2	1	2	2	2	2	0	0	2	0	0	2	2	3	0	1	0	0	5	7	16.0701	3	0	0	0	1	1	0	0	0	0	0	1	1	0	14
447	18	1	4	2	1	3	5	4	5	0	1	0	1	0	0	0	1	0	0	0	1	0	0	2	4	2	1	0	1	0	4	8	22.5895	3	0	0	0	1	0	1	0	0	1	1	1	1	0	3
448	17	0	4	1	0	3	3	4	5	0	0	1	1	3	2	0	0	0	0	0	1	0	0	4	5	5	0	0	0	0	3	14	19.5703	2	0	0	0	1	1	0	0	0	0	0	3	0	1	7
449	18	0	4	1	1	4	5	5	2	0	3	1	1	0	1	1	0	1	3	0	1	0	0	1	3	3	0	0	0	0	5	7	19.3333	3	0	0	0	1	1	0	0	0	0	0	1	1	0	11
450	18	1	4	1	0	4	4	5	5	0	3	1	1	3	0	0	1	1	0	0	2	0	0	2	3	3	0	0	0	0	2	8	18.424	3	0	0	0	1	1	0	0	0	1	1	1	1	0	10
451	19	0	4	2	1	4	4	5	5	0	1	2	1	1	0	2	1	1	1	1	3	0	1	4	3	3	0	0	0	0	3	10	17.9931	3	0	0	0	1	0	1	0	0	0	0	2	0	0	10
452	18	0	4	2	1	2	2	4	3	0	2	0	1	1	1	0	1	3	1	0	2	0	0	4	3	3	0	0	0	0	5	10	18.8	3	0	0	0	1	0	1	0	0	0	0	2	0	0	10
453	19	0	4	1	1	5	5	2	2	0	1	1	3	1	3	1	0	2	2	1	2	0	1	2	2	3	0	0	1	0	2	7	18.6719	3	0	0	0	1	1	0	0	0	0	0	1	1	0	14
454	18	0	4	2	1	2	2	2	3	0	1	2	0	1	0	0	0	1	0	0	2	0	0	3	4	5	0	0	0	0	3	12	18.3143	3	0	0	0	1	0	1	0	0	1	0	3	0	1	5
455	18	1	4	2	1	3	2	3	3	0	1	2	0	1	1	1	0	1	0	0	1	0	0	2	4	3	0	0	0	0	3	9	19.3548	3	0	0	0	1	0	1	0	0	0	0	2	0	0	7
456	19	0	4	1	1	3	3	3	3	0	1	1	0	1	1	0	1	0	0	0	1	0	0	4	5	5	0	0	0	0	3	14	19.437	3	0	0	0	1	1	0	0	0	0	0	3	0	1	5
457	17	1	4	2	1	4	5	3	2	0	2	1	2	1	2	1	1	1	1	0	2	0	0	3	4	3	0	0	0	0	3	10	19.721	2	0	0	0	1	0	1	0	0	1	1	2	0	0	12
458	17	1	4	2	1	4	3	5	4	0	1	1	0	1	1	2	0	0	0	0	1	0	0	4	5	5	0	0	0	0	4	14	19.5092	2	0	0	0	1	0	1	0	0	0	0	3	0	1	6
459	19	0	4	3	1	4	4	5	3	0	0	1	1	1	1	1	2	0	0	0	1	0	0	4	3	4	0	0	0	0	3	11	20.1362	3	0	0	0	1	0	0	1	0	0	0	2	0	0	7
460	19	1	4	4	1	2	5	3	2	0	1	1	2	1	2	1	1	1	1	0	2	0	0	4	3	3	0	0	0	0	5	10	17.2265	3	0	0	0	1	0	0	0	1	0	1	2	0	0	11
461	18	0	4	2	1	3	3	2	2	0	1	1	2	3	1	2	3	1	0	0	2	0	0	4	3	2	0	0	0	0	4	9	18.3883	3	0	0	0	1	0	1	0	0	0	0	2	0	0	14
462	18	0	4	2	1	2	2	4	3	0	2	0	1	1	1	0	1	3	1	0	1	0	0	4	3	3	0	0	0	0	5	10	18.4444	3	0	0	0	1	0	1	0	0	0	0	2	0	0	10
463	17	0	4	2	1	4	4	4	3	0	3	2	1	1	0	0	3	2	1	0	1	0	0	3	2	2	0	0	0	0	4	7	17.5278	2	0	0	0	1	0	1	0	0	0	0	1	1	0	13
464	18	1	4	2	1	3	3	1	1	1	2	2	0	1	0	0	3	1	2	0	1	0	0	2	2	1	0	0	1	0	4	5	18.3655	3	0	0	0	1	0	1	0	0	0	1	1	1	0	11
465	18	0	4	3	1	5	2	5	3	0	1	1	1	0	0	2	1	2	1	0	2	0	0	4	3	3	0	0	0	0	4	10	16.7126	3	0	0	0	1	0	0	1	0	1	1	2	0	0	9
466	17	0	4	1	1	1	4	4	3	0	1	2	2	0	3	2	0	1	1	1	2	1	1	4	2	2	0	0	0	0	4	8	16.7588	2	0	0	0	1	1	0	0	0	0	1	1	1	0	12
467	18	1	4	2	1	2	5	3	3	0	1	1	0	0	0	0	0	0	0	0	1	0	0	4	5	5	0	0	0	0	4	14	20.3244	3	0	0	0	1	0	1	0	0	0	0	3	0	1	2
468	17	0	4	3	1	1	3	3	1	1	1	0	1	1	1	1	1	1	0	0	1	0	0	4	5	5	0	0	0	0	3	14	19.3548	2	0	0	0	1	0	0	1	0	0	0	3	0	1	7
469	18	1	4	2	1	4	5	3	2	1	2	3	2	1	1	1	1	1	0	0	1	0	0	4	5	2	0	0	0	0	5	11	16.875	3	0	0	0	1	0	1	0	0	0	0	2	0	0	12
470	19	0	4	2	1	1	5	2	3	1	1	3	1	2	1	2	1	1	1	0	2	0	0	2	2	2	0	0	0	0	3	6	19.3548	3	0	0	0	1	0	1	0	0	1	0	1	1	0	13
471	18	0	4	3	1	3	5	5	3	0	0	0	3	2	1	0	2	0	0	0	2	0	0	2	2	3	0	0	0	0	4	7	20.2706	3	0	0	0	1	0	0	1	0	0	1	1	1	0	8
472	18	1	4	3	1	4	5	5	5	0	0	0	0	0	0	0	1	0	0	0	1	0	0	4	3	3	0	0	0	0	5	10	23.8754	3	0	0	0	1	0	0	1	0	0	0	2	0	0	1
473	18	0	4	3	1	5	4	4	3	0	1	0	0	0	0	1	2	0	0	0	1	0	0	3	3	4	0	0	0	0	5	10	21.3281	3	0	0	0	1	0	0	1	0	0	0	2	0	0	4
474	17	0	4	1	1	3	3	4	1	1	2	1	1	1	0	1	1	0	0	0	1	0	0	1	5	5	0	0	0	0	4	11	22.8889	2	0	0	0	1	1	0	0	0	0	0	2	0	0	7
475	19	1	4	4	1	2	5	3	2	0	1	2	1	1	1	1	1	1	1	0	2	0	0	4	3	3	0	0	0	0	5	10	17.2265	3	0	0	0	1	0	0	0	1	0	1	2	0	0	10
476	18	0	4	2	1	3	3	2	2	0	1	1	2	3	1	2	3	1	0	0	2	0	0	4	5	5	0	0	0	0	4	14	18.3883	3	0	0	0	1	0	1	0	0	0	0	3	0	1	14
477	18	0	4	2	1	2	2	4	3	0	2	0	1	1	1	0	1	3	1	0	1	0	0	4	3	3	0	0	0	0	5	10	20.5333	3	0	0	0	1	0	1	0	0	0	0	2	0	0	10
478	17	0	4	2	1	4	4	4	3	0	3	2	1	1	0	0	3	2	1	0	1	0	0	3	2	2	0	0	0	0	4	7	16.9563	2	0	0	0	1	0	1	0	0	0	0	1	1	0	13
479	18	1	4	2	1	3	3	1	1	1	2	2	0	1	0	0	3	1	2	0	1	0	0	2	2	1	0	0	1	0	4	5	19.3572	3	0	0	0	1	0	1	0	0	0	1	1	1	0	11
480	18	0	4	3	1	5	2	5	3	0	2	1	1	1	1	1	1	1	1	1	2	1	1	4	3	3	0	0	0	0	4	10	16.7126	3	0	0	0	1	0	0	1	0	1	1	2	0	0	10
481	19	1	4	4	1	2	5	3	2	0	1	1	2	1	2	1	1	1	1	0	2	0	0	4	2	2	0	0	0	0	5	8	17.2265	3	0	0	0	1	0	0	0	1	0	1	1	1	0	11
482	18	0	4	2	1	3	3	2	2	0	1	1	2	3	1	2	3	1	0	0	2	0	0	4	2	2	0	0	0	0	4	8	18.3883	3	0	0	0	1	0	1	0	0	0	0	1	1	0	14
483	18	1	4	2	1	2	2	4	3	0	2	0	1	1	1	0	1	3	1	0	1	0	0	4	3	3	0	0	0	0	5	10	18	3	0	0	0	1	0	1	0	0	0	0	2	0	0	10
484	17	0	4	2	1	4	4	4	3	0	3	2	1	1	0	0	3	2	1	0	1	0	0	3	2	3	0	0	0	0	4	8	17.3754	2	0	0	0	1	0	1	0	0	0	0	1	1	0	13
485	18	1	4	2	1	3	3	2	2	1	2	2	0	1	0	0	3	1	2	0	1	0	0	2	2	2	0	0	1	0	4	6	19.798	3	0	0	0	1	0	1	0	0	0	1	1	1	0	11
486	18	0	4	3	1	4	4	4	4	0	3	3	1	0	0	1	2	0	0	0	2	0	0	4	2	2	0	1	0	0	3	8	22.5781	3	0	0	0	1	0	0	1	0	1	1	1	1	0	10
487	17	0	4	3	1	4	2	5	5	0	1	0	2	2	1	1	1	2	0	0	2	0	0	4	2	1	0	0	0	0	4	7	17.9851	2	0	0	0	1	0	0	1	0	0	0	1	1	0	10
488	18	1	4	1	1	5	4	4	4	0	1	1	0	0	1	0	1	1	0	0	2	0	0	4	5	4	0	0	0	0	4	13	19.0496	3	0	0	0	1	1	0	0	0	1	1	3	0	1	5
489	18	1	4	1	1	4	4	5	5	0	1	1	1	1	1	2	1	1	0	0	1	0	0	4	5	3	0	0	0	0	4	12	18.4965	3	0	0	0	1	1	0	0	0	1	0	3	0	1	9
490	19	0	4	3	1	5	4	5	4	0	1	1	0	1	0	0	0	0	0	0	1	0	0	4	5	5	0	0	0	0	5	14	20.635	3	0	0	0	1	0	0	1	0	0	0	3	0	1	3
491	18	0	4	1	1	3	3	4	4	0	0	1	2	0	0	0	0	0	0	0	1	0	0	1	5	3	0	0	0	0	3	9	22.3289	3	0	0	0	1	1	0	0	0	0	0	2	0	0	3
492	18	1	4	1	1	2	3	2	3	0	0	0	3	1	0	0	0	0	0	0	1	0	0	1	4	2	0	0	0	0	5	7	20.4475	3	0	0	0	1	1	0	0	0	0	0	1	1	0	4
493	19	1	4	1	1	5	3	2	3	1	1	3	1	0	0	1	0	0	0	0	2	0	0	3	5	1	0	0	0	0	4	9	16.598	3	0	0	0	1	1	0	0	0	1	0	2	0	0	6
494	18	1	4	2	1	5	4	4	3	0	1	0	0	0	0	0	0	0	0	0	1	0	0	3	3	3	0	0	0	0	5	9	19.5578	3	0	0	0	1	0	1	0	0	0	0	2	0	0	1
495	18	0	4	3	1	3	3	5	4	0	1	1	1	1	0	0	0	0	0	0	1	0	0	4	4	5	0	0	0	0	4	13	26.2601	3	0	0	0	1	0	0	1	0	1	0	3	0	1	4
496	18	0	4	2	1	4	4	4	4	0	3	3	1	0	0	1	2	0	0	0	2	0	0	4	2	2	0	1	0	0	3	8	19.6094	3	0	0	0	1	0	1	0	0	1	1	1	1	0	10
497	17	0	4	2	1	4	2	5	5	0	1	0	2	2	1	1	1	2	0	0	2	0	0	4	2	1	0	0	0	0	4	7	17.9851	2	0	0	0	1	0	1	0	0	0	0	1	1	0	10
498	18	1	4	1	1	5	4	4	4	0	1	1	0	0	1	0	1	1	0	0	2	0	0	4	5	4	0	0	0	0	4	13	19.0496	3	0	0	0	1	1	0	0	0	1	1	3	0	1	5
499	18	1	4	1	1	4	4	5	5	0	1	1	1	1	1	2	1	1	0	0	1	0	0	4	5	3	0	0	0	0	4	12	18.4965	3	0	0	0	1	1	0	0	0	1	0	3	0	1	9
500	19	0	4	3	1	5	4	5	4	0	1	1	0	1	0	0	0	0	0	0	1	0	0	4	5	5	0	0	0	0	5	14	19.7055	3	0	0	0	1	0	0	1	0	0	0	3	0	1	3
501	18	0	4	2	1	3	3	4	4	0	0	1	2	0	0	0	0	0	0	0	1	0	0	1	5	3	0	0	0	0	3	9	17.9089	3	0	0	0	1	0	1	0	0	0	0	2	0	0	3
502	18	1	4	1	1	2	3	2	3	0	0	0	3	1	0	0	0	0	0	0	1	0	0	1	4	2	0	0	0	0	5	7	19.257	3	0	0	0	1	1	0	0	0	0	0	1	1	0	4
503	17	1	4	2	1	5	3	2	3	1	1	3	1	0	0	1	0	0	0	0	2	0	0	3	5	1	0	0	0	0	4	9	19.1001	2	0	0	0	1	0	1	0	0	1	0	2	0	0	6
504	18	1	4	2	1	5	4	4	3	0	1	0	0	0	0	0	0	0	0	0	1	0	0	3	3	3	0	0	0	0	5	9	19.6641	3	0	0	0	1	0	1	0	0	0	0	2	0	0	1
505	18	0	4	2	1	3	3	5	4	0	1	1	1	1	0	0	0	0	0	0	1	0	0	4	4	5	0	0	0	0	4	13	30.6293	3	0	0	0	1	0	1	0	0	1	0	3	0	1	4
506	19	1	4	2	1	4	4	3	3	0	1	2	2	2	3	0	3	0	0	0	2	0	0	2	2	2	0	0	0	0	5	6	18.1662	3	0	0	0	1	0	1	0	0	0	0	1	1	0	13
507	18	1	4	3	1	4	4	5	5	0	3	1	2	1	2	0	2	0	0	0	1	0	0	4	3	3	0	1	0	0	3	10	20.1408	3	0	0	0	1	0	0	1	0	1	1	2	0	0	11
508	17	0	4	2	1	2	5	1	2	1	0	0	1	1	1	0	1	0	0	1	1	0	0	4	3	2	0	0	0	0	5	9	22.4813	2	0	0	0	1	0	1	0	0	0	0	2	0	0	4
509	19	1	4	1	1	2	5	4	3	0	0	1	2	1	1	0	1	0	0	0	1	0	0	4	5	5	0	0	0	0	4	14	22.6003	3	0	0	0	1	1	0	0	0	0	0	3	0	1	6
510	18	0	4	2	1	3	4	5	5	0	1	1	1	3	0	0	3	1	1	1	3	1	0	4	2	3	0	0	0	0	3	9	19.5312	3	0	0	0	1	0	1	0	0	1	0	2	0	0	11
511	19	0	4	2	1	2	5	4	3	0	1	1	1	0	1	0	2	0	0	1	2	0	0	4	5	5	0	0	0	0	5	14	24.4352	3	0	0	0	1	0	1	0	0	0	0	3	0	1	6
512	19	0	4	1	1	4	5	5	5	0	0	0	1	0	0	0	0	0	0	0	1	0	0	4	5	5	0	0	0	0	4	14	17.898	3	0	0	0	1	1	0	0	0	0	0	3	0	1	1
513	18	0	4	2	1	3	3	4	4	0	2	0	2	2	1	1	1	1	0	0	2	0	0	2	3	1	0	0	0	0	1	6	18.3594	3	0	0	0	1	0	1	0	0	0	0	1	1	0	10
514	17	0	4	1	1	5	4	5	5	0	1	0	0	0	1	0	0	0	0	0	1	0	0	2	5	5	0	0	0	0	5	12	19.433	2	0	0	0	1	1	0	0	0	0	0	3	0	1	2
515	18	0	4	1	1	4	4	5	5	0	1	1	0	0	0	0	0	0	0	0	1	0	0	4	5	5	0	1	0	0	5	14	25.4028	3	0	0	0	1	1	0	0	0	0	0	3	0	1	2
516	19	1	4	1	1	3	3	5	4	0	1	0	1	1	1	0	0	0	0	0	2	0	0	4	5	5	0	1	0	0	5	14	19.5988	3	0	0	0	1	1	0	0	0	0	0	3	0	1	4
517	18	1	4	2	1	2	2	3	2	0	0	1	1	1	1	0	1	1	0	1	2	0	0	2	4	2	0	0	0	0	3	8	17.0433	3	0	0	0	1	0	1	0	0	1	0	1	1	0	6
518	19	0	4	4	1	4	4	5	5	0	3	1	1	2	3	0	2	0	0	0	2	0	0	4	3	3	0	0	0	0	4	10	17.2421	3	0	0	0	1	0	0	0	1	1	0	2	0	0	12
519	18	1	4	2	1	3	3	3	4	0	0	1	2	1	1	0	0	1	0	1	2	0	0	4	5	5	0	0	0	0	4	14	18.9619	3	0	0	0	1	0	1	0	0	1	0	3	0	1	6
520	19	0	4	2	1	5	5	4	3	0	1	1	2	2	3	2	0	0	0	0	2	0	0	4	2	2	0	0	0	0	3	8	16.901	3	0	0	0	1	0	1	0	0	0	0	1	1	0	11
521	19	1	4	2	0	4	4	4	5	0	1	2	1	1	1	0	0	0	0	0	1	0	0	1	5	3	0	0	1	0	4	9	20.9396	3	0	0	0	1	0	1	0	0	0	0	2	0	0	6
522	19	0	4	2	0	3	3	3	4	0	1	1	3	2	1	0	1	3	1	0	4	1	0	3	3	2	0	1	0	0	3	8	19.5092	3	0	0	0	1	0	1	0	0	1	1	1	1	0	13
523	18	1	4	1	1	3	5	5	5	0	1	0	1	0	0	0	0	0	0	0	1	0	0	4	2	4	0	0	0	0	4	10	19.2425	3	0	0	0	1	1	0	0	0	0	0	2	0	0	2
524	18	1	4	2	1	1	1	2	3	1	3	1	1	2	2	0	3	0	0	0	2	0	0	3	4	1	0	1	1	0	2	8	18.5826	3	0	0	0	1	0	1	0	0	0	0	1	1	0	12
525	19	1	4	1	1	4	4	5	5	0	1	0	0	0	0	0	0	0	0	0	1	0	0	1	3	3	0	0	0	0	3	7	20.1408	3	0	0	0	1	1	0	0	0	0	0	1	1	0	1
526	17	0	4	2	1	5	2	5	4	0	0	1	1	1	3	0	3	1	0	0	2	0	0	4	2	2	0	0	0	0	4	8	22.3569	2	0	0	0	1	0	1	0	0	0	0	1	1	0	10
527	19	0	4	4	1	5	4	4	5	0	1	1	0	0	1	0	1	0	0	0	1	0	0	4	4	5	0	0	0	0	5	13	23.7118	3	0	0	0	1	0	0	0	1	0	0	3	0	1	4
528	19	1	4	2	1	4	5	5	5	0	3	1	3	0	1	0	0	0	0	0	2	0	0	3	5	5	0	0	0	0	3	13	19.1327	3	0	0	0	1	0	1	0	0	0	0	3	0	1	8
529	18	0	4	2	1	2	5	3	2	0	1	0	1	0	0	0	0	0	0	0	1	0	0	4	5	5	0	0	0	0	5	14	20.5078	3	0	0	0	1	0	1	0	0	0	0	3	0	1	2
530	19	1	4	2	1	3	3	4	4	0	1	1	1	1	2	0	1	1	0	0	1	0	0	4	5	3	0	0	0	0	3	12	16.6493	3	0	0	0	1	0	1	0	0	0	0	3	0	1	8
531	19	0	4	2	1	2	5	4	2	0	1	0	0	0	0	0	0	0	0	0	1	0	0	4	5	5	0	0	0	0	5	14	19.8347	3	0	0	0	1	0	1	0	0	0	0	3	0	1	1
532	18	1	4	3	1	4	5	5	4	0	1	1	0	1	1	0	1	2	1	0	1	0	0	4	5	5	0	1	0	0	5	14	19.5556	3	0	0	0	1	0	0	1	0	0	0	3	0	1	8
533	19	0	4	1	1	4	5	4	3	0	1	0	1	0	1	0	0	0	0	0	2	0	0	1	5	5	0	1	0	0	2	11	18.132	3	0	0	0	1	1	0	0	0	0	0	2	0	0	3
534	17	1	4	2	1	4	4	4	5	0	2	1	1	1	1	1	0	0	0	0	1	0	0	1	5	3	0	0	1	0	4	9	20.9396	2	0	0	0	1	0	1	0	0	0	0	2	0	0	7
535	19	0	4	2	1	3	3	3	4	0	3	1	1	2	1	0	1	1	1	0	4	1	0	3	3	2	0	1	0	0	3	8	19.5092	3	0	0	0	1	0	1	0	0	1	1	1	1	0	11
536	18	1	4	1	1	3	5	5	5	0	1	0	1	0	0	0	0	0	0	0	1	0	0	4	2	4	0	0	0	0	4	10	17.1468	3	0	0	0	1	1	0	0	0	0	0	2	0	0	2
537	18	1	4	2	1	1	1	2	3	1	3	1	1	2	2	0	3	0	0	0	2	0	0	3	4	1	0	1	1	0	2	8	17.5146	3	0	0	0	1	0	1	0	0	0	0	1	1	0	12
538	17	1	4	1	1	4	4	5	5	0	1	0	0	0	0	0	0	0	0	0	1	0	0	1	3	3	0	0	0	0	3	7	20.1408	2	0	0	0	1	1	0	0	0	0	0	1	1	0	1
539	19	0	4	2	1	5	2	5	4	0	0	1	1	1	3	0	3	1	0	0	2	0	0	4	3	2	0	0	0	0	4	9	19.6995	3	0	0	0	1	0	1	0	0	0	0	2	0	0	10
540	18	0	4	3	1	5	4	4	5	0	1	1	0	0	1	0	1	0	0	0	1	0	0	4	4	5	0	0	0	0	5	13	23.7118	3	0	0	0	1	0	0	1	0	0	0	3	0	1	4
541	17	1	4	2	0	4	5	5	5	0	3	1	3	0	1	0	0	0	0	0	2	0	0	3	5	5	0	0	0	0	3	13	19.1327	2	0	0	0	1	0	1	0	0	0	0	3	0	1	8
542	18	1	4	2	1	2	5	3	2	0	1	0	1	0	0	0	0	0	0	0	1	0	0	4	5	5	0	0	0	0	5	14	19.2837	3	0	0	0	1	0	1	0	0	0	0	3	0	1	2
543	19	0	4	2	1	3	3	4	4	0	2	1	1	2	1	2	1	1	1	1	2	1	1	4	3	3	0	0	0	0	3	10	16.6493	3	0	0	0	1	0	1	0	0	0	0	2	0	0	12
544	19	1	4	2	1	2	5	4	2	0	1	0	0	0	0	0	0	0	0	0	1	0	0	4	5	5	0	0	0	0	5	14	19.8347	3	0	0	0	1	0	1	0	0	0	0	3	0	1	1
545	19	0	4	4	1	4	5	5	4	0	1	1	0	1	1	0	1	2	0	0	1	0	0	4	5	5	0	1	0	0	5	14	19.5556	3	0	0	0	1	0	0	0	1	0	0	3	0	1	7
546	18	0	4	1	0	4	5	4	3	0	1	0	1	0	1	1	0	0	0	0	1	0	0	1	5	5	0	1	0	0	2	11	18.132	3	0	0	0	1	1	0	0	0	0	0	2	0	0	4
